# A Standard System to Study Vertebrate Embryos

Ingmar Werneburg\*

Paläontologisches Museum und Institut der Universität Zürich, Zürich, Switzerland

## Abstract

Staged embryonic series are important as reference for different kinds of biological studies. I summarise problems that occur when using ‘staging tables’ of ‘model organisms’. Investigations of developmental processes in a broad scope of taxa are becoming commonplace. Beginning in the 1990s, methods were developed to quantify and analyse developmental events in a phylogenetic framework. The algorithms associated with these methods are still under development, mainly due to difficulties of using non-independent characters. Nevertheless, the principle of comparing clearly defined newly occurring morphological features in development (events) in quantifying analyses was a key innovation for comparative embryonic research. Up to date no standard was set for how to define such events in a comparative approach. As a case study I compared the external development of 23 land vertebrate species with a focus on turtles, mainly based on reference staging tables. I excluded all the characters that are only identical for a particular species or general features that were only analysed in a few species. Based on these comparisons I defined 104 developmental characters that are common either for all vertebrates (61 characters), gnathostomes (26), tetrapods (3), amniotes (7), or only for sauropsids (7). Characters concern the neural tube, somite, ear, eye, limb, maxillary and mandibular process, pharyngeal arch, eyelid or carapace development. I present an illustrated guide listing all the defined events. This guide can be used for describing developmental series of any vertebrate species or for documenting specimen variability of a particular species. The guide incorporates drawings and photographs as well as consideration of species identifying developmental features such as colouration. The simple character-code of the guide is extendable to further characters pertaining to external and internal morphological, physiological, genetic or molecular development, and also for other vertebrate groups not examined here, such as Chondrichthyes or Actinopterygii. An online database to type in developmental events for different stages and species could be a basis for further studies in comparative embryology. By documenting developmental events with the standard code, sequence heterochrony studies (i.e. Parsimov) and studies on variability can use this broad comparative data set.

**Citation:** Werneburg I (2009) A Standard System to Study Vertebrate Embryos. PLoS ONE 4(6): e5887. doi:10.1371/journal.pone.0005887

**Editor:** Vincent Laudet, Ecole Normale Supérieure de Lyon, France

**Received:** December 19, 2008; **Accepted:** March 18, 2009; **Published:** June 12, 2009

**Copyright:** © 2009 Werneburg. This is an open-access article distributed under the terms of the Creative Commons Attribution License, which permits unrestricted use, distribution, and reproduction in any medium, provided the original author and source are credited.

**Funding:** The study was supported by the Swiss National Fund (3100A0-116013) granted to Marcelo R. Sanchez-Villagra and the Forschungskredit der Universität Zuerich (No. 3772) granted to Ingmar Werneburg. The funders had no role in study design, data collection and analysis, decision to publish, or preparation of the manuscript.

**Competing Interests:** The author has declared that no competing interests exist.

\* E-mail: ingmar\_werneburg@yahoo.de

## Introduction

“I will discuss this topic very briefly, because it seems to be redundant to me to describe things with words that everyone realises easily when reckoning the drawings.” (Richard Semon, 1894c, on the development of the echidna’s body shape [1: page 72]).

Documenting embryological development is a particular challenge for comparative anatomy and evolutionary research [2–4]. During the last decade the value of developmental characters in a phylogenetic framework was emphasised and new parsimony-based methods were developed to analyse phylogenetic patterns in embryology [5–8]. Unfortunately, at present, a common language for defining developmental characters, which may serve as a basis to create a large comparable fundament for comparative embryology research, does not exist.

Documentation of embryological development (**Figure 1**) began with early typological *atlas publications* of human embryos such as that of Soemmerring [9]. Herein series of the rare available, aborted embryos were presented, which were ordered chronologically by days and months after the last menstruation cycle of the mother. The authors “sought to see beyond mere individuals to represent types” [10]. Wilhelm His [11] refrained from typology and developed a *normal plate system* (“*Normaltafeln*”)

where individuals are represented showing a probably ‘normal’, non pathological development. Oppel [12] established extensive embryonic *normal tables*, which document the development of internal organs. Franz Keibel was the first who unified these two approaches (**Figure 1**) and edited a 16 volume series of *Normal Plates of the Development of the Vertebrates* beginning with the ‘normal development’ of the domestic pig [13]. In this large format series, high standard drawings as well as a tabular and written documentation of the developmental processes and variability within one species were presented. Although he praised Keibel’s work, Hopwood [10,14] criticised that the project failed as a whole because no synthesis of embryological patterns and no general conclusion about variability could be elucidated. In the first part of the 20<sup>th</sup> century Ross G. Harrison designed a set of *stages for Amblystoma* based on his survey on several specimens (*staging table/normal stages*). He standardised them by a series of drawings and by describing characters typical for each stage in a text format [completely published: 15]. With the rising interest in comparative embryology numerous staging tables in the Harrison-style were published for the main vertebrate groups and established as a “common language” between laboratories. But they were treated more as tools rather than results [i.e. 16, chicken embryology]. During the last decades the use of clade representative ‘model

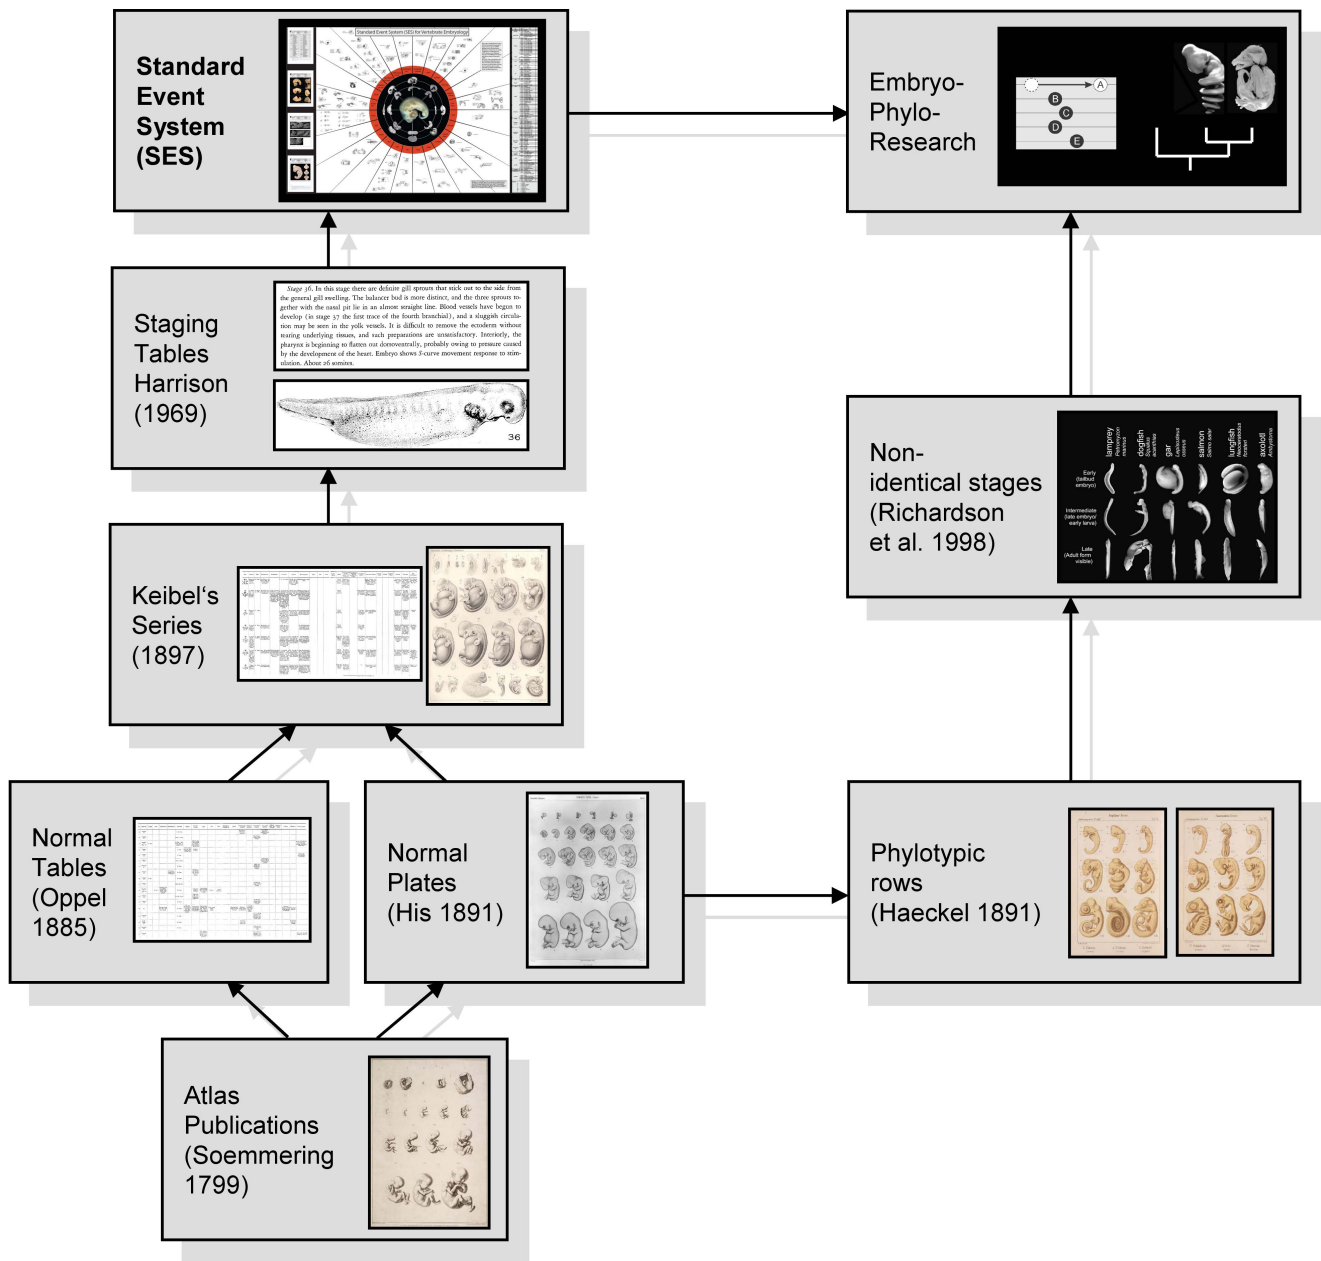

**Figure 1. Scheme of the history of documenting embryology and of embryological research.** Illustrations modified from cited references and Jeffery et al. [7], for the presented Standard Event System a shortcut of the supplementary poster (**Poster S1**) is used. For historical details see text and Hopwood [10,14].

doi:10.1371/journal.pone.0005887.g001

**Figure 2. Definition and illustration of external morphological characters that describe a developmental event (Page 1 of 3).** Standard codes (V01a etc.) as defined in the text. CC = Character complex, CN = Character name, SEC = Standard Event Code. Character complexes as occur and evolved within V = Vertebrata, G = Gnathostomata, T = Tetrapoda, A = Amniota or only within S = Sauropsida. Illustrations modified after Guyout et al. [40], Renous et al. [44] and Mahmood et al. [89], with exception from "V01a", "V13e" and "V14a", which are from different sources. Except for few obvious drawings: left = anterior, right = posterior. Nomenclature follows mainly Schoenwolf [90]. Please note the pictures are only used for character illustration and do not necessarily reflect the first occurrence of the character in the shown species. For continuation compare

**Figure 3–4.**

doi:10.1371/journal.pone.0005887.g002

**Figure 3. Character definition and illustration (Page 2 of 3).** For description and continuation of the list compare **Figure 2 and 4.**

doi:10.1371/journal.pone.0005887.g003

**Figure 4. Character definition and illustration (Page 3 of 3).** For description and continuation of the list compare **Figure 2–3.**

doi:10.1371/journal.pone.0005887.g004

| CC                | SFC                         | CN                                                                                                                                                                                                                                                                                                                                                          | description of the characters                                                                          | character illustrations    |                                                                                                                                                                                                                                                                                                                                                                                                                           |  |      |                              |                                                                                                                              |  |  |
|-------------------|-----------------------------|-------------------------------------------------------------------------------------------------------------------------------------------------------------------------------------------------------------------------------------------------------------------------------------------------------------------------------------------------------------|--------------------------------------------------------------------------------------------------------|----------------------------|---------------------------------------------------------------------------------------------------------------------------------------------------------------------------------------------------------------------------------------------------------------------------------------------------------------------------------------------------------------------------------------------------------------------------|--|------|------------------------------|------------------------------------------------------------------------------------------------------------------------------|--|--|
| egg (V01)         | V01a                        | egg lay                                                                                                                                                                                                                                                                                                                                                     | Most authors begin to create their staging tables shortly after or around egg lay time.                |                            |                                                                                                                                                                                                                                                                                                                                                                                                                           |  |      |                              |                                                                                                                              |  |  |
|                   | blastula (V02)              |                                                                                                                                                                                                                                                                                                                                                             |                                                                                                        |                            |                                                                                                                                                                                                                                                                                                                                                                                                                           |  |      |                              |                                                                                                                              |  |  |
|                   | V02a                        | blastoporus                                                                                                                                                                                                                                                                                                                                                 | The blastoporus begins to form as a lip and is later on visible as a clear depression in the blastula. |                            |                                                                                                                                                                                                                                                                                                                                                                                                                           |  |      |                              |                                                                                                                              |  |  |
| neural tube (V03) |                             |                                                                                                                                                                                                                                                                                                                                                             | V03a                                                                                                   | primitive streak           | The neural plate starts folding. The lateral primitive folds border the primitive groove.                                                                                                                                                                                                                                                                                                                                 |  |      |                              |                                                                                                                              |  |  |
|                   |                             |                                                                                                                                                                                                                                                                                                                                                             | V03b                                                                                                   | neural folds closure       | The dorsal borders of the neural folds come in touch and begin to form the neural tube that encloses the neural tube. The anterior and posterior regions of the primitive streak remain open.                                                                                                                                                                                                                             |  |      |                              |                                                                                                                              |  |  |
|                   |                             |                                                                                                                                                                                                                                                                                                                                                             | V03c                                                                                                   | anterior neuropore closed  | The neural tube closes anteriorly by final caudal fusion of the primitive folds.                                                                                                                                                                                                                                                                                                                                          |  |      |                              |                                                                                                                              |  |  |
|                   |                             |                                                                                                                                                                                                                                                                                                                                                             | V03d                                                                                                   | posterior neuropore closed | The neural tube closes posteriorly by final caudal fusion of the primitive folds.                                                                                                                                                                                                                                                                                                                                         |  |      |                              |                                                                                                                              |  |  |
| somites (V04)     |                             |                                                                                                                                                                                                                                                                                                                                                             | V04a                                                                                                   | somites hard count         | Correlated to the internal differentiation and partly due to the carapace forming in turtles somite borders become blurred in specific regions until somites are completely inconspicuous.                                                                                                                                                                                                                                |  |      |                              |                                                                                                                              |  |  |
|                   |                             |                                                                                                                                                                                                                                                                                                                                                             | V04b                                                                                                   | 1-5 * somites              | * number of somite pairs<br><br>The total number of somite pairs is to be count, filled in a formula for each specimen and afterwards grouped within the somite cluster of five somites each. Seldom the left and the right side show a different number of mesodermal segments. By definition the row with the maximum is to be count. Often a somite pair underlies a forming process. This one should also be counted. |  |      |                              |                                                                                                                              |  |  |
|                   |                             |                                                                                                                                                                                                                                                                                                                                                             | V04c                                                                                                   | 6-10 somites               |                                                                                                                                                                                                                                                                                                                                                                                                                           |  |      |                              |                                                                                                                              |  |  |
|                   |                             |                                                                                                                                                                                                                                                                                                                                                             | V04d                                                                                                   | 11-15 somites              |                                                                                                                                                                                                                                                                                                                                                                                                                           |  |      |                              |                                                                                                                              |  |  |
|                   |                             |                                                                                                                                                                                                                                                                                                                                                             | V04e                                                                                                   | 16-20 somites              |                                                                                                                                                                                                                                                                                                                                                                                                                           |  |      |                              |                                                                                                                              |  |  |
|                   |                             |                                                                                                                                                                                                                                                                                                                                                             | V04f                                                                                                   | 21-25 somites              |                                                                                                                                                                                                                                                                                                                                                                                                                           |  |      |                              |                                                                                                                              |  |  |
|                   |                             |                                                                                                                                                                                                                                                                                                                                                             | V04g                                                                                                   | 26-30 somites              |                                                                                                                                                                                                                                                                                                                                                                                                                           |  |      |                              |                                                                                                                              |  |  |
|                   |                             |                                                                                                                                                                                                                                                                                                                                                             | V04h                                                                                                   | 31-35 somites              |                                                                                                                                                                                                                                                                                                                                                                                                                           |  |      |                              |                                                                                                                              |  |  |
|                   |                             |                                                                                                                                                                                                                                                                                                                                                             | V04i                                                                                                   | 36-40 somites              |                                                                                                                                                                                                                                                                                                                                                                                                                           |  |      |                              |                                                                                                                              |  |  |
|                   |                             |                                                                                                                                                                                                                                                                                                                                                             | V04j                                                                                                   | 41-45 somites              |                                                                                                                                                                                                                                                                                                                                                                                                                           |  |      |                              |                                                                                                                              |  |  |
|                   |                             |                                                                                                                                                                                                                                                                                                                                                             | V04k                                                                                                   | 46-50 somites              |                                                                                                                                                                                                                                                                                                                                                                                                                           |  |      |                              |                                                                                                                              |  |  |
|                   |                             |                                                                                                                                                                                                                                                                                                                                                             | head (V05)                                                                                             |                            |                                                                                                                                                                                                                                                                                                                                                                                                                           |  | V05a | head bulbous                 | The head is formed as a distinct "bulbus" and a slight strangling (neck) restricts the head region from the thoracic region. |  |  |
|                   |                             |                                                                                                                                                                                                                                                                                                                                                             |                                                                                                        |                            |                                                                                                                                                                                                                                                                                                                                                                                                                           |  | V05b | anterior cephalic projection | The neck elongates and is at least as long as broad.                                                                         |  |  |
| V05c              | head projection disappeared | The forming of a mesencephalic (or/and a diencephalic) projection in the posterodorsal region of the head is characterized by a continuing growth and can not be defined as a distinguishable event. But the disappearance of the structure resulting in a flat occipital head region can be well defined and is possibly associated to skull ossification. |                                                                                                        |                            |                                                                                                                                                                                                                                                                                                                                                                                                                           |  |      |                              |                                                                                                                              |  |  |
| V06a              | olfactory pit               | The nasal placode occurs.                                                                                                                                                                                                                                                                                                                                   |                                                                                                        |                            |                                                                                                                                                                                                                                                                                                                                                                                                                           |  |      |                              |                                                                                                                              |  |  |
| V06b              | external nares              | Deep furrows between the frontonasal and maxillary processes develop and are visible as invaginations in the nasal region.                                                                                                                                                                                                                                  |                                                                                                        |                            |                                                                                                                                                                                                                                                                                                                                                                                                                           |  |      |                              |                                                                                                                              |  |  |

| ear (V07) |      |                              | eye (V08)                                                                                                                                                                                                                                                                                                                                     |      |                   | ribs (V09)                     |     | heart (V10)                                 |  | tail (V11) |                             |
|-----------|------|------------------------------|-----------------------------------------------------------------------------------------------------------------------------------------------------------------------------------------------------------------------------------------------------------------------------------------------------------------------------------------------|------|-------------------|--------------------------------|-----|---------------------------------------------|--|------------|-----------------------------|
|           | V07a | otic pit                     |                                                                                                                                                                                                                                                                                                                                               | V08d | contour lens/iris |                                | V09 | rib primordia                               |  | V10a       | ventricle bulbus            |
|           | V07b | otic vesicle                 | The ear is formed by an invagination and a capsule is forming that becomes large in turtles.                                                                                                                                                                                                                                                  |      | V08e              | pupil forms                    |     | rib primordia visible through carapace/skin |  | V10b       | thoracic bulbus disappeared |
|           | V07c | otic capsule inconspicuous   | The skin becomes intransparent and the otic capsule is not longer visible.                                                                                                                                                                                                                                                                    |      | V08f              | scleral papillae               |     | ventricle bulbus                            |  | V10c       | ventricle S-shaped          |
|           | V07d | otic vesicle                 | An optic vesicle forms lateral of the prosencephalic region. It can be mistaken for the trigeminal ganglion which is proportional enlarged in <i>Tachyglossus</i> or <i>Monodelphis</i> at this early period of development. But the ganglion lies more caudally.                                                                             |      | V08g              | scleral papillae inconspicuous |     | ventricle/liver bulbus disappeared          |  | V11        | tail bud forms              |
|           | V07e | lens vesicle                 | The lens vesicle forms in the middle of the optic cup and primarily has only an indistinct contour.                                                                                                                                                                                                                                           |      | V08h              | scleral papillae disappeared   |     | heart S-shaped                              |  |            |                             |
|           | V07f | optic fissure                | The optic or choroid fissure represents the blood vessel agglomeration, which supplies the developing lens. It forms a clear streak between the lens and the ventral most curvature of the optic cup. When the lens is completely formed the optic fissure disappears, which is a fluent process that can not be defined as a distinct event. |      |                   |                                |     |                                             |  |            |                             |
|           | V07g | contour lens/iris            | The lens is completely formed and shows a distinct contour. Parallel the iris gets its contour but is often hard to distinguish from the lens.                                                                                                                                                                                                |      |                   |                                |     |                                             |  |            |                             |
|           | V07h | pupil forms                  | In the middle of the optic cup/lens region the pupil forms. That reflects the complete formation of the iris musculature.                                                                                                                                                                                                                     |      |                   |                                |     |                                             |  |            |                             |
|           | V07i | scleral papillae             | Between the lens and the border of the optic cup circularly scleral bones occur.                                                                                                                                                                                                                                                              |      |                   |                                |     |                                             |  |            |                             |
|           | V07j | scleral papillae disappeared | The scleral papillae become inconspicuous.                                                                                                                                                                                                                                                                                                    |      |                   |                                |     |                                             |  |            |                             |
|           | V07k | rib primordia                | Rib primordia are visible through the carapace or skin for a short time of development.                                                                                                                                                                                                                                                       |      |                   |                                |     |                                             |  |            |                             |
|           | V07l | ventricle bulbus             | The developing heart (ventricle) primordium forms a small bulging in the ventral thoracic region.                                                                                                                                                                                                                                             |      |                   |                                |     |                                             |  |            |                             |
|           | V07m | thoracic bulbus disappeared  | During development the ventricle and the liver form a common thoracic bulbus which disappears when the plastron forms in turtles or ribs ossify.                                                                                                                                                                                              |      |                   |                                |     |                                             |  |            |                             |
|           | V07n | ventricle S-shaped           | The ventricle forms a curvature that gives the ventricle an S-shaped look.                                                                                                                                                                                                                                                                    |      |                   |                                |     |                                             |  |            |                             |
|           | V07o | tail bud forms               | Although in many references a tail is arbitrarily described very early or in association to the development to the hind limb bud here the occurrence of the <i>tail bud</i> is defined as a distinct constriction of the caudal body region.                                                                                                  |      |                   |                                |     |                                             |  |            |                             |

|                   |      |                        |                                                                                                                                                                                                                                                                                                       |  |
|-------------------|------|------------------------|-------------------------------------------------------------------------------------------------------------------------------------------------------------------------------------------------------------------------------------------------------------------------------------------------------|--|
| limbs (V12)       | V12a | forelimb ridge         | The forelimb bud generally develops shortly earlier or at the same time as the hindlimb bud does. It is a lateral eruption of the body wall that is wider (anterior-posterior) than long (proximal-distal).                                                                                           |  |
|                   | V12b | forelimb bud           | The forelimb bud is about as broad as wide.                                                                                                                                                                                                                                                           |  |
|                   | V12c | forelimb elongated     | The forelimb bud is longer (proximal-distal) than wide (anterior-posterior).                                                                                                                                                                                                                          |  |
|                   | V12d | forelimb AER           | On the distal part of the forelimb bud an apical ectodermal ridge (AER) is formed in a horizontal longitude. Often it is only visible as a slightly eruption and in a particular angle of view.                                                                                                       |  |
|                   | V12e | hindlimb AER           | On the distal part of the hindlimb bud an apical ectodermal ridge (AER) is formed in a horizontal longitude.                                                                                                                                                                                          |  |
|                   | V12f | forelimb elbow         | The forelimb develops an elbow which angle should be more or less 90°. If the species doesn't evolve such a clear elbow (like <i>Tachyglossus</i> ) the angle should never be less than 45°.                                                                                                          |  |
|                   | V12g | forelimb paddle        | The forelimb is thicker distally than proximally. Paddle shaped.                                                                                                                                                                                                                                      |  |
|                   | V12h | hindlimb paddle        | The hindlimb is thicker distally than proximally. Paddle shaped.                                                                                                                                                                                                                                      |  |
|                   | V12i | forelimb digital plate | In the distal region of the forelimb a round digital plate is formed by flattening of its paddle like end in a horizontal plane. The digital plate is clearly separated from the tube shaped leg by a surrounding step.                                                                               |  |
|                   | V12j | hindlimb digital plate | In the distal region of the hindlimb a digital plate forms.                                                                                                                                                                                                                                           |  |
|                   | V12k | digital grooves        | On the forelimb digital grooves/ridges are visible. Sometimes grooves develop simultaneously, sometimes only one or two ridges are visible first.                                                                                                                                                     |  |
|                   | V12l | digital serration      | The periphery of the digital plate is slightly serrated on the forelimb.                                                                                                                                                                                                                              |  |
|                   | V12m | finger                 | At least one forelimb phalanx projects beyond the digital web and is longer than wide.                                                                                                                                                                                                                |  |
|                   | V12n | first claw             | At least one claw develops on the forelimb.                                                                                                                                                                                                                                                           |  |
| scales/etc. (V13) | V13a | head scales            | Scales on the dorsum of the head occur. The forming of scutes on throat and lower eyelid are encoded separately. Due feathers and scales are assumed to be homologous the scale characters are also applicable to bird development. Mammalian hears are formed differently and are not regarded here. |  |
|                   | V13b | throat scales          | Scales between the lower jaw and the ventral neck region occur.                                                                                                                                                                                                                                       |  |
|                   | V13c | eyelid scales          | Scales on the lower eyelid occur.                                                                                                                                                                                                                                                                     |  |
|                   | V13d | neck scales            | Scales on the neck occur. This character is sometimes difficult to define in cryptidre turtles due the head/neck retraction.                                                                                                                                                                          |  |

|             |                         |                          |                                                                                                                                    |                                                                                                                                                                                                                                                                                                                                                                                                                     |                                                                                                                                                                                                                                                                                                                                                                                                                         |  |
|-------------|-------------------------|--------------------------|------------------------------------------------------------------------------------------------------------------------------------|---------------------------------------------------------------------------------------------------------------------------------------------------------------------------------------------------------------------------------------------------------------------------------------------------------------------------------------------------------------------------------------------------------------------|-------------------------------------------------------------------------------------------------------------------------------------------------------------------------------------------------------------------------------------------------------------------------------------------------------------------------------------------------------------------------------------------------------------------------|--|
| hatch (V14) | V13e                    | back scales              | Scales on the back (the dorsal) of the trunk. Scales on the carapace in turtles are encoded separately.                            |                                                                                                                                                                                                                                                                                                                                                                                                                     |                                                                                                                                                                                                                                                                                                                                                                                                                         |  |
|             | V13f                    | limb scales              | The first occurrence of scales on a limb. Generally on the upper part of the forelimb.                                             |                                                                                                                                                                                                                                                                                                                                                                                                                     |                                                                                                                                                                                                                                                                                                                                                                                                                         |  |
|             | V13g                    | whole forelimb scales    | The forelimb is completely covered by scales, which includes the cover of the whole leg and the digital region.                    |                                                                                                                                                                                                                                                                                                                                                                                                                     |                                                                                                                                                                                                                                                                                                                                                                                                                         |  |
|             | V13h                    | tail scales              | Scales on the tail occur.                                                                                                          |                                                                                                                                                                                                                                                                                                                                                                                                                     |                                                                                                                                                                                                                                                                                                                                                                                                                         |  |
|             | V13i                    | carapace scales          | Horny scutes on the turtle carapace develop already in the egg. They are difficult to demonstrate in photographs.                  |                                                                                                                                                                                                                                                                                                                                                                                                                     |                                                                                                                                                                                                                                                                                                                                                                                                                         |  |
|             | V14a                    | hatch                    | Mostly, but not necessarily the hatch represents the end of the embryonic, organ differentiating period in egg laying vertebrates. |                                                                                                                                                                                                                                                                                                                                                                                                                     |                                                                                                                                                                                                                                                                                                                                                                                                                         |  |
|             | maxillary process (G01) | G01a                     | max bud                                                                                                                            | The maxillary process occurs as a bud posterior to the eye. Often it is clearly seen as the anterodorsal process of the first pharyngeal arch.                                                                                                                                                                                                                                                                      |                                                                                                                                                                                                                                                                                                                                                                                                                         |  |
|             |                         | G01b                     | max posterior eye                                                                                                                  | The maxillary process lies posterior to the eye for a long period. First, when a clear rostrad development of the maxillary process is recognizable, its position at the level of the posterior margin of the optic cup should be noted. For identifying the level of the maxillary process in respect to the eye the ventral border of the telencephalic/diencephalic head region must be orientated horizontally. |                                                                                                                                                                                                                                                                                                                                                                                                                         |  |
|             |                         | G01c                     | max midline eye                                                                                                                    | The tip of the maxillary process is located at the level of the optic (choroid) fissure, around the midline of the eye.                                                                                                                                                                                                                                                                                             |                                                                                                                                                                                                                                                                                                                                                                                                                         |  |
|             |                         | G01d                     | max anterior lens                                                                                                                  | The tip of the maxillary process is located beyond the optic fissure and is situated around the level of the anterior borders of pupil, iris, lens and scleral papillae.                                                                                                                                                                                                                                            |                                                                                                                                                                                                                                                                                                                                                                                                                         |  |
|             |                         | G01e                     | max anterior eye                                                                                                                   | The tip of the maxillary process is located beyond the level of the anterior border of the eye up to the posterior margin of frontonasal process.                                                                                                                                                                                                                                                                   |                                                                                                                                                                                                                                                                                                                                                                                                                         |  |
|             |                         | G01f                     | max frontonasal fuse                                                                                                               | The maxillary process fuses with the frontonasal process and both form a more or less consistent upper jaw.                                                                                                                                                                                                                                                                                                         |                                                                                                                                                                                                                                                                                                                                                                                                                         |  |
|             |                         | mandibular process (G02) | G02a                                                                                                                               | mand arch bud                                                                                                                                                                                                                                                                                                                                                                                                       | The first pharyngeal (mandibular) arch is generally the first pharyngeal arch to occur as a bud. It forms later on a dorsal maxillary and a ventral mandibular process.                                                                                                                                                                                                                                                 |  |
|             |                         |                          | G02b                                                                                                                               | mand posterior eye                                                                                                                                                                                                                                                                                                                                                                                                  | The mandibular process lays posterior to the eye for a long period. First, when a clear rostrad development of the mandibular process is recognizable, its position around the level of the posterior margin of the optic cup should be noted. For defining the level of the mandibular process in respect to the eye the ventral border of the telencephalic/diencephalic head region must be orientated horizontally. |  |
| G02c        |                         |                          | mand posterior lens                                                                                                                | The tip of the mandibular process is situated around the level of the posterior margins of scleral papillae, lens, iris and pupil.                                                                                                                                                                                                                                                                                  |                                                                                                                                                                                                                                                                                                                                                                                                                         |  |



|                         |                        |                                  |                                                                                                                                                                                        |                                                             |
|-------------------------|------------------------|----------------------------------|----------------------------------------------------------------------------------------------------------------------------------------------------------------------------------------|-------------------------------------------------------------|
| pharyngeal arches (G03) | G02d                   | mand midline eye                 | The tip of the mandibular process is located around the level of the optic (choroid) fissure, around the midline of the eye.                                                           |                                                             |
|                         | G02e                   | mand anterior lens               | The tip of the mandibular process is located beyond the level of the optic fissure and is situated around the level of the anterior borders of pupil, iris, lens and scleral papillae. |                                                             |
|                         | G02f                   | mand anterior eye                | The tip of the mandibular process is situated at the level around the anterior border of the eye.                                                                                      |                                                             |
|                         | G02g                   | mand level frontonasal           | The tip of the mandibular process is situated at the level of the frontonasal process.                                                                                                 |                                                             |
|                         | G02g                   | mand occlusion point             | The tip of the mandibular process developed to the occlusion point with the upper jaw.                                                                                                 |                                                             |
|                         | pharyngeal slits (G04) | G03a                             | 2nd arch                                                                                                                                                                               | The second pharyngeal arch, the hyoid arch occurs as a bud. |
| G03b                    |                        | 3rd arch                         | The third pharyngeal arch occurs as a bud.                                                                                                                                             |                                                             |
| G03c                    |                        | 4th arch                         | The fourth pharyngeal arch occurs as a bud.                                                                                                                                            |                                                             |
| G03d                    |                        | 5th arch                         | The fifth pharyngeal arch occurs as a bud.                                                                                                                                             |                                                             |
| G03e                    |                        | hyoid flap                       | The second (hyoid) arch develops an opercular flap that covers at least one pharyngeal slit.                                                                                           |                                                             |
| urogenital papillae     | G04a                   | 1st slit                         | The first pharyngeal slit, which is the lateral opening of the 1st pharyngeal pouch, occurs between the 1st and the 2nd pharyngeal arch.                                               |                                                             |
|                         | G04b                   | 2nd slit                         | The second pharyngeal slit occurs between the 2nd and the 3rd pharyngeal arch.                                                                                                         |                                                             |
|                         | G04c                   | 3rd slit                         | The third pharyngeal slit occurs between the 3rd and the 4th pharyngeal arch.                                                                                                          |                                                             |
|                         | G04d                   | 4th slit                         | The 4th pharyngeal slit occurs between the 4th and the 5th pharyngeal arch.                                                                                                            |                                                             |
| G04e                    | slits closed           | All pharyngeal slits are closed. |                                                                                                                                                                                        |                                                             |
| neck (T01)              | G05a                   | urogenital papilla bud           | Between the hind limbs an urogenital papillae occurs as a distinct bud.                                                                                                                |                                                             |
|                         | G05b                   | urogenital papilla inconspicuous | The urogenital organs are drawn into the body and the papillae becomes inconspicuous.                                                                                                  |                                                             |
| T01a                    | T01a                   | cervical flexure 90°             | During development of different species a 90° cervical flexure can occur and reverse several times. Only the first occurrence of a 90° cervical flexure is to be noted.                |                                                             |
|                         | T01b                   | cervical flexure disappeared     | Only the final disappearance of the cervical flexure (compare T01a) is to be noted.                                                                                                    |                                                             |
|                         | T01c                   | wrinkles on neck                 | The first occurrence of wrinkles on the dorsum of the neck.                                                                                                                            |                                                             |

|                |      |                               |                                                                                                                                                                                                                                                                                        |  |
|----------------|------|-------------------------------|----------------------------------------------------------------------------------------------------------------------------------------------------------------------------------------------------------------------------------------------------------------------------------------|--|
| eye lids (A01) | A01a | lower lid                     | First occurrence of the lower eyelid.                                                                                                                                                                                                                                                  |  |
|                | A01b | eyelid begun overgrows        | The lower eyelid has begun overgrowing the eye but does not reach the scleral papillae yet.                                                                                                                                                                                            |  |
|                | A01c | eyelid at scleral papillae    | The lower eyelid has grown dorsad up to the lower margin of the iris or is at least around the lower curvature of the scleral papillae.                                                                                                                                                |  |
|                | A01d | eyelid ventral lens           | The lower eyelid reaches the ventral margin of the lens.                                                                                                                                                                                                                               |  |
|                | A01e | eyelid half eye               | The lower eyelid covers at least half of the eye/pupil.                                                                                                                                                                                                                                |  |
|                | A01f | membrana nictitans            | The membrana nictitans, the "third eyelid", occurs in the anterior angle of the eye.                                                                                                                                                                                                   |  |
| caruncle (A02) | A02a | caruncle                      | The caruncle (egg tooth) is first visible as a medial calcification of the skin that covers the symphysis of the maxillaries and lies between the nasal openings. Later on it enlarges and fuses with the maxillaries to get a mechanical support for slashing the egg while hatching. |  |
|                | S01a | ramphotheca                   | Horny ramphothecae, an autapomorphy of turtles, are sometimes described as "lips" or "labia" in literature and form distinct "beaks".                                                                                                                                                  |  |
| carapace (S02) | S02a | carapacial ridge              | On the lateral side of the trunk and between fore- and hind limb a distinct horizontal carapacial ridge occurs in turtle development.                                                                                                                                                  |  |
|                | S02b | longitudinal carapacial ridge | The capacial ridge of turtles elongates beyond the roots of the limbs and forms a lateral longitudinal border of the already recognizable carapace.                                                                                                                                    |  |
|                | S02c | carapace not anterior         | The anterior border of the turtle carapace is not yet defined.                                                                                                                                                                                                                         |  |
|                | S02d | carapace clearly limited      | The turtle carapace is now clearly limited around its periphery.                                                                                                                                                                                                                       |  |
|                | S02e | carapace beyond tail          | The posterior carapacial edge of turtles projects beyond the root of the tail.                                                                                                                                                                                                         |  |
|                | S02f | carapace irregular            | The turtle carapace becomes irregular around its periphery.                                                                                                                                                                                                                            |  |

organisms' was questioned [17–19], highlighting problems created by limited sampling and the biases in phylogenetic comparisons in Evo-Devo studies. To circumvent this problem, an increasing number of scientists has attempted to establish new organisms as 'models' throughout vertebrates [i.e. 20–23].

The recent development of sequence heterochrony (temporal shifts in development) methods [5–8,24–27] set the basis to analyse different developmental patterns between species in a phylogenetic context. These methods compare *events* i.e., newly occurring characters in development [28]. Further studies calculate the variation of developmental sequences [29] in a phylogenetic framework [30]. Up to date no comparable standard has been developed to describe and to depict developmental events.

This study samples mostly turtles, but includes characters relevant for vertebrates in general. First descriptions of turtle embryology were given by Agassiz [31], Rathke [32] and Parker [33] in the 19<sup>th</sup> century. In the second part of the 20<sup>th</sup> century two studies, following the Harrison-style of staging tables, influenced turtle developmental studies. On the one hand Yntema's [34] study on the 'model organism' *Chelydra serpentina* (Cryptodira) set a long lasting 27 staged standard for staging non-marine turtle embryos. Several authors have pointed out differences in development of other species, such as timing in limb development [35–37] or distribution of scales and pigmentation patterns [38]. The applicability of described characters of a certain species to those of a related species was questioned [39]. In the last few years the development of external characters was described in detail for several turtle species [38–42], but the stages designed by Yntema [34] remained standard. On the other hand, observing six species, Miller [43] proposed a 31 staged standard for marine turtle (Chelonioida) embryology [44].

When comparing the embryology of diverse vertebrate groups [6,45] the necessity of a standard to describe developmental features in early development is obvious. In turtles for example, authors have focused on the development of specific elements such as the urogenital system and the head [38] or the limbs [46]. Other authors, who have a different approach, described a few external features superficially [47].

A new method to comprehensively describe developmental characters throughout all vertebrate groups is presented. Therefore I elaborated a detailed description of 104 developmental characters of external morphology (Figure 2–4). Based on these descriptions an extendable type-in-formula is provided

to document character sets of diverse species. The problems encountering when 'staging' developmental series, and a solution to them, are discussed. Also ideas to establish an online database are presented, in which inter- as well as intraspecific variability can be documented. Here I follow the approach of Oppel [12] who documented intraspecific variation in his extended normal tables.

## Results

I introduce a *Standard Event System* (SES) to document embryological development comparatively. Using this term I avoid typological terms such as staging table, normal stage or normal development. Embryonic series are to be arranged in defined SES-stages. These SES-stages are described and illustrated in a SES-formula (Figure 5–8, Table S1, S2). The SES-formula can be used either to describe only one specimen or to define features that characterise the synopsis of several specimens representing one single - author defined - stage. In the formula I also offer space for a traceable cataloging, for additional descriptions of specimen/species identifying characters such as pigmentation, carapace shape or scute/feather-arrangement features, as well as space for drawings and photographs. This formula offers a check-list for SES-characters (Figure 5) presented in a particular specimen/stage. Each SES-character is simply encoded by a SES-code comprising 104 characters thoroughly described in Figure 2–4. The three-part SES-code is generated for characters that evolved and differentiated within Vertebrata (V), Gnathostomata (G), Tetrapoda (T), Amniota (A) or only within Sauropsida (S). Character complexes are listed such as the "maxillary process (G01)" of Gnathostomata or "eye lids (A01)" of Amniota. For each event that occurs within the referred character complex, a small letter is used: i.e. "maxillary process present as a bud (G01a)", "maxillary process fuses with frontonasal process (G01f)" or "lower eyelid covers half of the eye (A01e)". Using this scheme the table is extendable. For example, including more Mammalia (M) species into the study, new character complexes can be comparatively added, such as "birth (M01a)", "hair on the top of the head (M02a)" or "hair on the throat (M02b)". In this way, beside external morphological characters also internal morphological, genetic, physiological and molecular characters can be included easily. For convenience, a printable formula template (Table S1, S2), one example of using such a formula (Figure 5–8), and a template for a printable laboratory poster depicting all SES-characters (Figure 9, Poster S1) are provided.

**Figure 5. Initial page of a filled SES-formula.** A 32 day old *Chelonia mydas* (Green sea turtle) embryo is used as a case example to illustrate how to fill an SES-formula. Embryological characters as described in Figure 2–4 are listed in a check list format. Below additional space is offered for further observations like on proportion or colouration. Each sheet of the SES-formula (see also Figure 5–7) has the same head listing species name, breeding temperature, embryo age, catalogue number, as well as one field to type in if either the formula is used to describe one single specimen or one stage (synopsis of several more or less similar specimens). For further instructions how to use the formula see Discussion.  
doi:10.1371/journal.pone.0005887.g005

**Figure 6. Second required page of a filled SES-formula.** On this page all observed SES-characters are depicted on illustrations of the specimen described. For comparability photographs should be made using a light microscope. A lateral, dorsal and ventral view of the whole body is required and more detailed illustrations are optional. Additional pages of this kind are imaginable. For further details see Figure 5 and Discussion.  
doi:10.1371/journal.pone.0005887.g006

**Figure 7. First optional page of a filled SES-formula.** On this page additional illustrations may be provided that are made using non-light-microscopy-observations like scanning electron microscopy. These pictures should not be used to illustrate SES-characters that are not visible in light microscopy. For further details see Figure 5 and Discussion.  
doi:10.1371/journal.pone.0005887.g007

**Figure 8. Second optional page of a filled SES-formula.** On this page illustrations of reference papers may be provided showing drawings/photographs of similar specimens/stages as the described one. For further details see Figure 5 and Discussion.  
doi:10.1371/journal.pone.0005887.g008

| Standard Event System for Vertebrate Embryology                                                                                                                                |                       |                 |                           |                         |
|--------------------------------------------------------------------------------------------------------------------------------------------------------------------------------|-----------------------|-----------------|---------------------------|-------------------------|
|  <b>species (group)</b><br><i>Chelonia mydas</i><br>(Testudines, Cryptodira,<br>Chelonioidea) | <b>stage/specimen</b> | <b>specimen</b> | <b>specimen/stage No.</b> | <b>IV / XII</b>         |
|                                                                                                                                                                                | <b>breeding temp.</b> | 25°C            | <b>collection No.</b>     | PIMUZ labNo.<br>2009.63 |
|                                                                                                                                                                                | <b>age (days)</b>     | 32d             | <b>sheet No.</b>          | 1 / 4                   |

| CC                 | SEC                | SE                             | ↓                      | CC                         | SEC                              | SE                           | ↓                             |                       |
|--------------------|--------------------|--------------------------------|------------------------|----------------------------|----------------------------------|------------------------------|-------------------------------|-----------------------|
| <b>egg</b>         | V01a               | egg lay                        |                        |                            | V13a                             | head scales                  |                               |                       |
| <b>blastula</b>    | V02a               | blastoporus                    |                        |                            | V13b                             | throat scales                |                               |                       |
| <b>neural tube</b> | V03a               | primitive streak               |                        | <b>scales/etc.</b>         | V13c                             | eyelid scales                |                               |                       |
|                    | V03b               | neural folds closure           |                        |                            | V13d                             | neck scales                  |                               |                       |
|                    | V03c               | anterior neuropore closed      |                        |                            | V13e                             | back scales                  |                               |                       |
|                    | V03d               | posterior neuropore closed     | x                      |                            | V13f                             | limb scales                  |                               |                       |
| <b>somites</b>     | V04a               | somites hard count             | x                      |                            | V13g                             | whole forelimb scales        |                               |                       |
|                    | V04b               | 1-5 somite pairs               |                        |                            | V13h                             | tail scales                  |                               |                       |
|                    | V04c               | 6-10 somite pairs              |                        |                            | V13i                             | carapace scutes              |                               |                       |
|                    | V04d               | 11-15 somite pairs             |                        |                            | <b>hatch</b>                     | V14a                         | hatch                         |                       |
|                    | V04e               | 16-20 somite pairs             |                        |                            | <b>maxillary process</b>         | G01a                         | max bud                       |                       |
|                    | V04f               | 21-25 somite pairs             |                        |                            |                                  | G01b                         | max posterior eye             |                       |
|                    | V04g               | 26-30 somite pairs             |                        | G01c                       |                                  | max midline eye              |                               |                       |
|                    | V04h               | 31-35 somite pairs             |                        | G01d                       |                                  | max anterior lens            |                               |                       |
|                    | V04i               | 36-40 somite pairs             |                        | G01e                       |                                  | max anterior eye             | x                             |                       |
|                    | V04j               | 41-45 somite pairs             |                        | G01f                       |                                  | max frontonasal fuse         |                               |                       |
| <b>head</b>        | V04k               | 46-50 somite pairs             |                        | <b>mandibular process</b>  | G02a                             | mand arch bud                |                               |                       |
|                    | V05a               | head bulbus                    |                        |                            | G02b                             | mand posterior eye           |                               |                       |
|                    | V05b               | anterior cephalic projection   |                        |                            | G02c                             | mand posterior lens          | x                             |                       |
| <b>nose</b>        | V05c               | head projection disappeared    |                        |                            | G02d                             | mand midline eye             |                               |                       |
|                    | V06a               | olfactory pit                  |                        |                            | G02e                             | mand anterior lens           |                               |                       |
| <b>ear</b>         | V06b               | external nares                 | x                      |                            | G02f                             | mand anterior eye            |                               |                       |
|                    | V07a               | otic pit                       |                        |                            | G02g                             | mand level frontonasal       |                               |                       |
| <b>eye</b>         | V07b               | otic vesicle                   | x                      |                            | G02g                             | mand occlusion point         |                               |                       |
|                    | V07c               | otic capsule inconspicuous     |                        |                            | <b>pharyngeal arches</b>         | G03a                         | 2nd arch                      | x                     |
|                    | V08a               | optic vesicle                  |                        |                            |                                  | G03b                         | 3rd arch                      | x                     |
|                    | V08b               | lens vesicle                   |                        | G03c                       |                                  | 4th arch                     | x                             |                       |
|                    | V08c               | optic fissure                  | x                      | G03d                       |                                  | 5th arch                     | x                             |                       |
|                    | <b>ribs</b>        | V08d                           | contour lens/iris      | x                          | G03e                             | hyoid flap                   | x                             |                       |
|                    |                    | V08e                           | pupil forms            | x                          | <b>pharyngeal slits</b>          | G04a                         | 1st slit                      |                       |
|                    |                    | V08f                           | scleral papillae       |                            |                                  | G04b                         | 2nd slit                      | x                     |
| V08g               |                    | scleral papillae inconspicuous |                        | G04c                       |                                  | 3rd slit                     |                               |                       |
| <b>heart</b>       | V09a               | rib primordia                  |                        | G04d                       |                                  | 4th slit                     |                               |                       |
|                    | V10a               | Ventricle bulbus               |                        | G04e                       |                                  | slits closed                 |                               |                       |
|                    | V10b               | thoracal bulbus disappeared    |                        | <b>urogenital papillae</b> | G05a                             | urogenital papilla bud       | x                             |                       |
| V10c               | ventricle S-shaped | x                              | G05b                   |                            | urogenital papilla inconspicuous |                              |                               |                       |
| <b>limbs</b>       | V11a               | tail bud                       |                        | <b>neck</b>                | T01a                             | cervical flexure 90°         | x                             |                       |
|                    | V12a               | forelimb ridge                 |                        |                            | T01b                             | cervical flexure disappeared |                               |                       |
|                    | V12b               | forelimb bud                   |                        |                            | T01c                             | wrinkles on neck             |                               |                       |
|                    | <b>limbs</b>       | V12c                           | forelimb elongated     |                            | <b>eye lids</b>                  | A01a                         | lower lid                     |                       |
|                    |                    | V12d                           | forelimb AER           | x                          |                                  | A01b                         | eyelid begun overgrow         |                       |
|                    |                    | V12e                           | hindlimb AER           | x                          |                                  | A01c                         | eyelid at scleral papillae    |                       |
|                    |                    | V12f                           | forelimb elbow         |                            |                                  | A01d                         | eyelid ventral lens           |                       |
|                    |                    | V12g                           | forelimb paddle        |                            |                                  | A01e                         | eyelid half eye               |                       |
|                    |                    | V12h                           | hindlimb paddle        |                            |                                  | A01f                         | membrana nictitans            |                       |
|                    |                    | V12i                           | forelimb digital plate | x                          | <b>caruncle</b>                  | A02a                         | caruncle                      |                       |
|                    |                    | V12j                           | hindlimb digital plate | x                          |                                  | <b>ramphothecae</b>          | S01a                          | ramphothecae          |
|                    |                    | V12k                           | digital grooves        |                            | S02a                             |                              | carapacial ridge              | x                     |
|                    |                    | V12l                           | digital serration      |                            | S02b                             |                              | longitudinal carapacial ridge |                       |
|                    |                    | <b>tail</b>                    | V12m                   | finger                     |                                  |                              | S02c                          | carapace not anterior |
| V12n               | first claw         |                                |                        | S02d                       | carapace clearly limited         |                              |                               |                       |
|                    |                    |                                |                        | S02e                       | carapace beyond tail             |                              |                               |                       |
|                    |                    |                                |                        | S02f                       | carapace irregular               |                              |                               |                       |

Legend: ↓ = mark the existing characters here as x

#### notes

- no coloration, no pigment cells visible
- specimen more or less comparable to stages 21-22 of Miller (1985), stage 4 of Parker (1880), stages 14-15 of Yntema (1968)
- differing from Parkers (1880) stage 4 (see sheet 4) in following details: in Parkers specimen the shape of all pharyngeal arches is more or less similar, no AER is shown, ca. 50 somites are clearly visible, heart with no internal (S-shaped) structure

| Standard Event System for Vertebrate Embryology                                                                                                                                  |                       |                 |                       |                         |
|----------------------------------------------------------------------------------------------------------------------------------------------------------------------------------|-----------------------|-----------------|-----------------------|-------------------------|
| <br><b>species (group)</b><br><i>Chelonia mydas</i><br>(Testudines, Cryptodira,<br>Chelonioida) | <b>stage/specimen</b> | <b>specimen</b> | <b>specimen No.</b>   | <b>IV / XII</b>         |
|                                                                                                                                                                                  | <b>breeding temp.</b> | 25°C            | <b>collection No.</b> | PIMUZ labNo.<br>2009.63 |
|                                                                                                                                                                                  | <b>age (days)</b>     | 32d             | <b>sheet No.</b>      | 2 / 4                   |

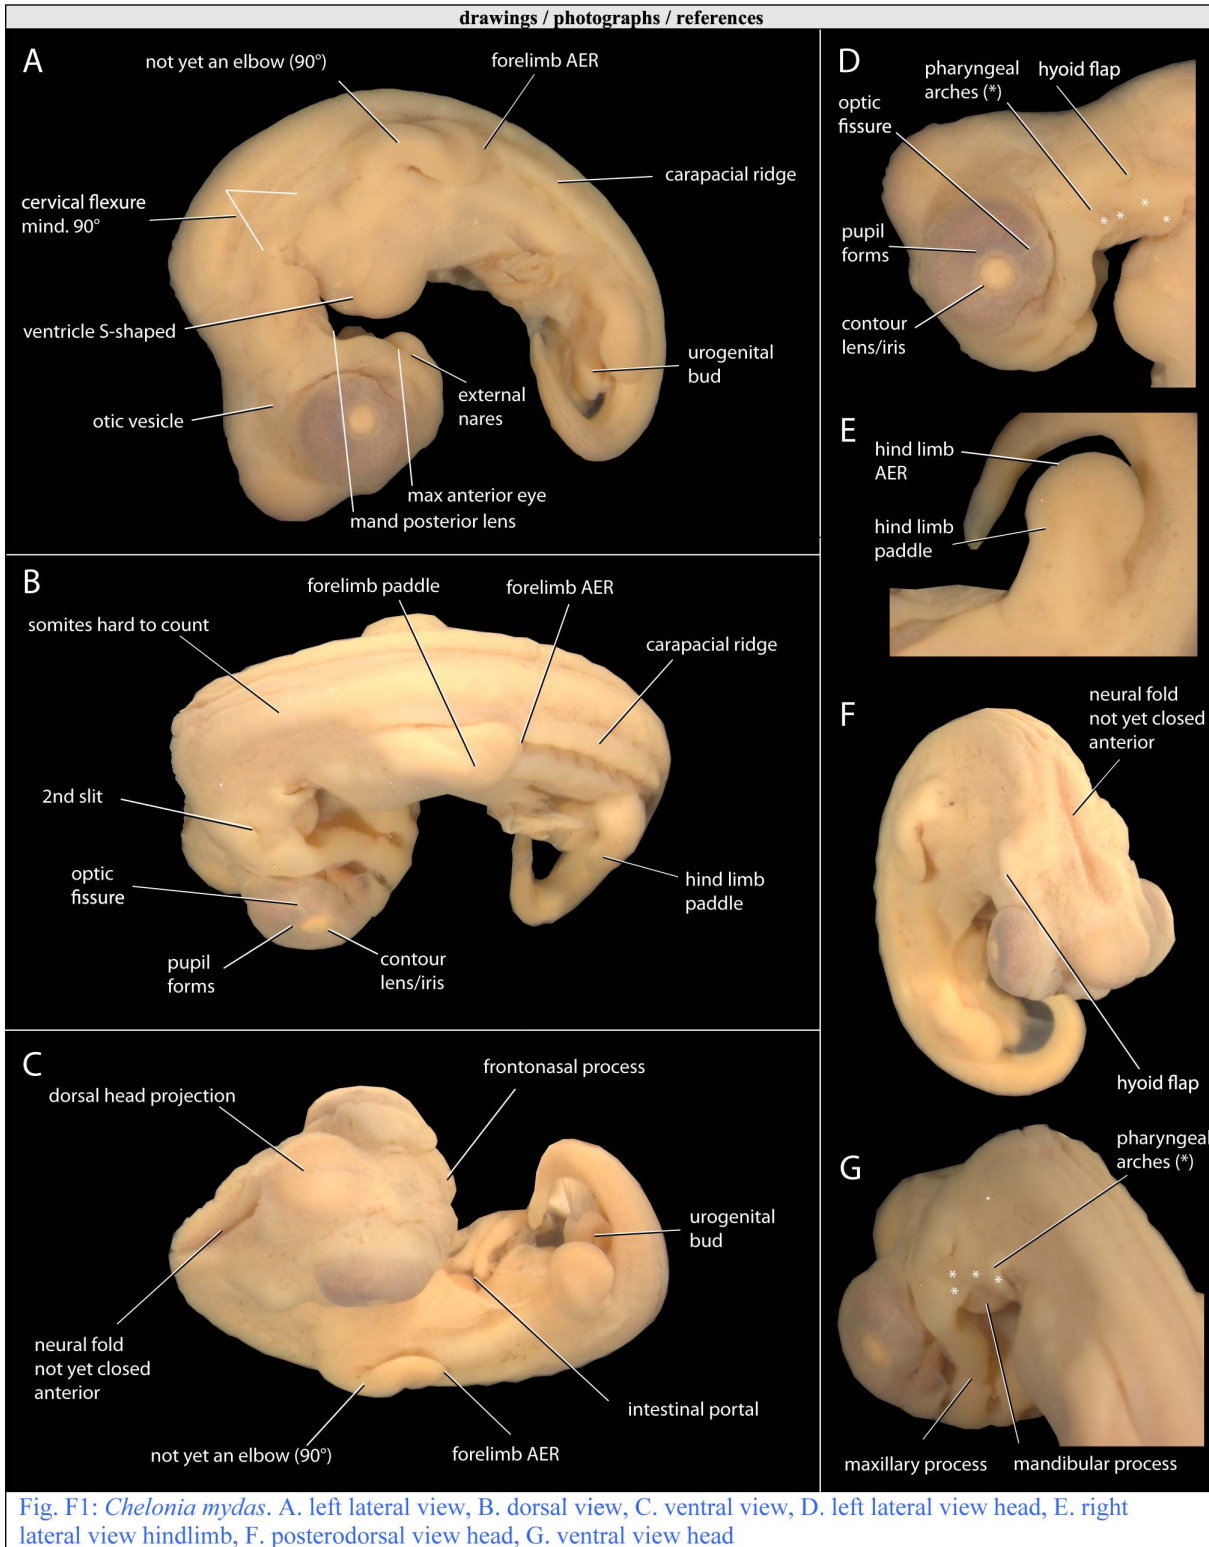



| Standard Event System for Vertebrate Embryology                                                                                                                                  |                       |                 |                           |                         |
|----------------------------------------------------------------------------------------------------------------------------------------------------------------------------------|-----------------------|-----------------|---------------------------|-------------------------|
| <br><b>species (group)</b><br><i>Chelonia mydas</i><br>(Testudines, Cryptodira,<br>Chelonioida) | <b>stage/specimen</b> | <b>specimen</b> | <b>specimen/stage No.</b> | <b>IV / XII</b>         |
|                                                                                                                                                                                  | <b>breeding temp.</b> | 25°C            | <b>collection No.</b>     | PIMUZ labNo.<br>2009.63 |
|                                                                                                                                                                                  | <b>age (days)</b>     | 32d             | <b>sheet No.</b>          | 3 / 4                   |

drawings / photographs / references

Figs. F2-9: Scanning electron microscopy photographs of *Chelonia mydas*

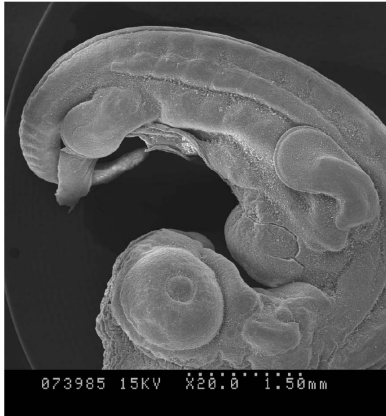

Fig. F2: right lateral side, posterior

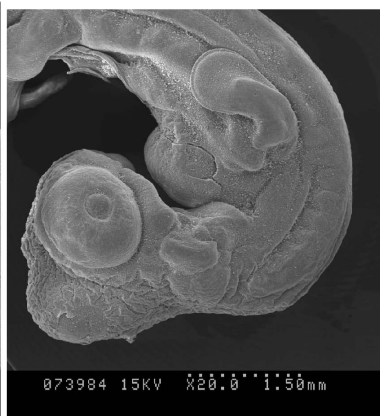

Fig. F3: right lateral side, anterior

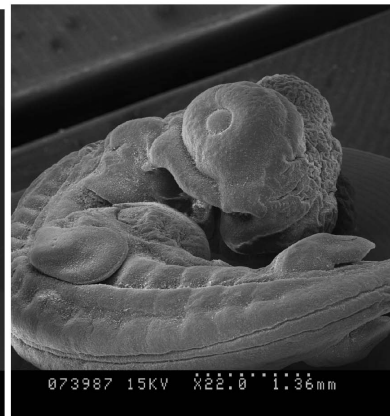

Fig. F4: right posterolateral view

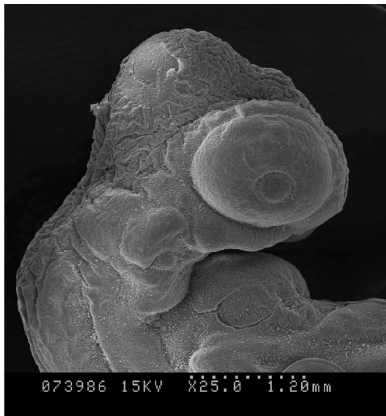

Fig. F5: right lateral view, head

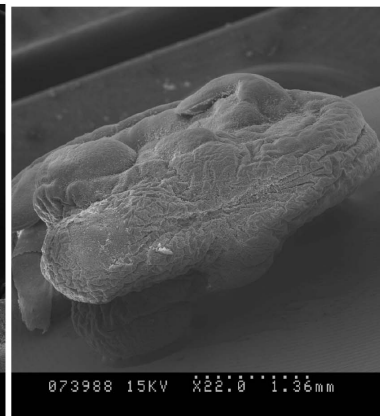

Fig. F6: right posterolateral view, head

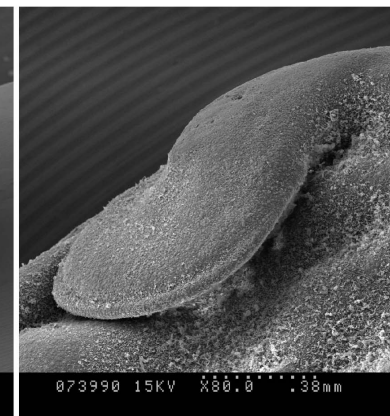

Fig. F7: ventral view, right forelimb

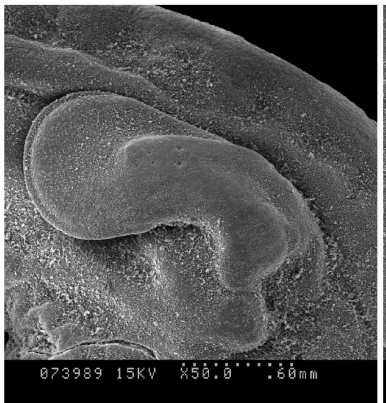

Fig. F8: lateral view, right forelimb

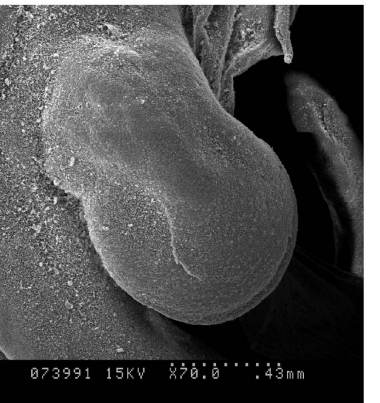

Fig. F9: lateral view right hindlimb

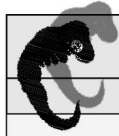

## Standard Event System for Vertebrate Embryology

|                                                                   |                       |                 |                       |       |
|-------------------------------------------------------------------|-----------------------|-----------------|-----------------------|-------|
| <b>species (group)</b>                                            | <b>stage/specimen</b> | <b>specimen</b> | <b>specimen No.</b>   |       |
| <i>Chelonia mydas</i><br>(Testudines, Cryptodira,<br>Chelonioida) | <b>breeding temp.</b> |                 | <b>collection No.</b> |       |
|                                                                   | <b>age (days)</b>     |                 | <b>sheet No.</b>      | 4 / 4 |

### drawings / photographs / references

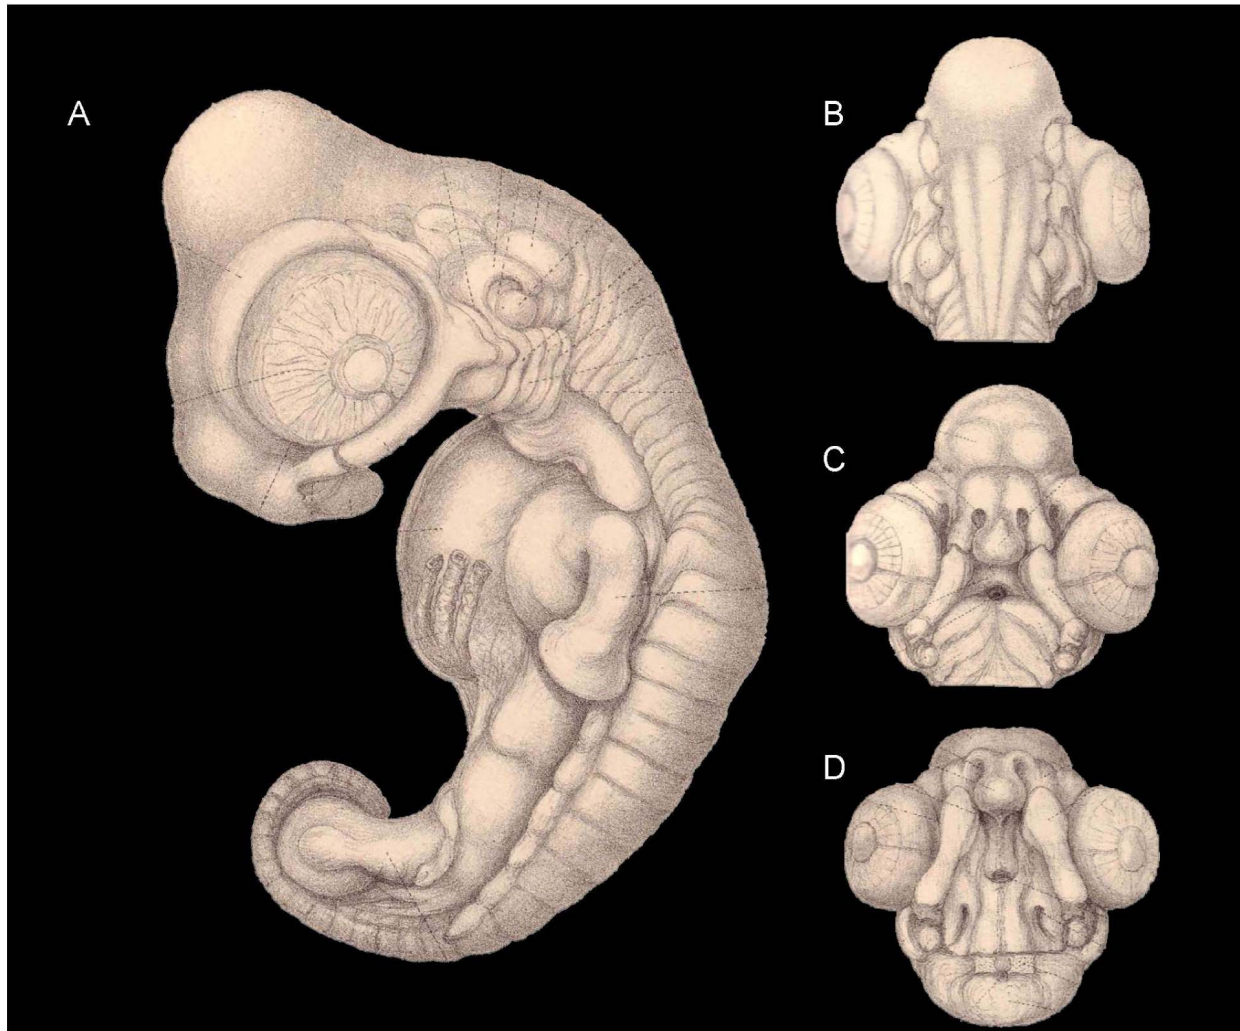

Fig. F10: Stage 4 *Chelonia mydas* embryo of Parker (1880). Labelling removed. A. lateral view, B. posterodorsal view head, C. ventral view head, D. ventral view head, mandibular process and pharyngeal arches removed

#### References:

- Miller, J. D. (1985), in *Biology of the Reptilia. Volume 14 - Development A*, C. Gans, F. Billet, P. F. A. Maderson, Eds. (John Wiley & Sons, New York, 1985), pp. 269-328.
- Parker, W. K. (1880), *Report on the development of the green turtle (Chelone viridis, Schneid.)*. Report of the scientific results of the voyage of H. M. S. Challenger during the years 1872-1876 (London Longmans, Green, 1880), vol. Zoology 1 (Part 5), pp. 1-57.
- Yntema, C. L. (1968). A series of stages in the embryonic development of *Chelydra serpentina*, *Journal of Morphology* 125, 219-251





subjective categorical approach of the author himself or that of his reference author (**Table S3**). Drawings may represent a typified embryo of a ‘stage’ and photographs, as mainly shown in the papers, can only represent one particular specimen that may illustrate all described characters of a particular ‘stage’. Apart from somite development, no variation between specimens of one species was recorded by most authors around one ‘stage’. Hence it is possible that much information about variation and character specifications has been lost by processing these typological categorisations.

**2. Intra-/Interspecific Variability.** The SES-formula can be used to document character sets of several specimens of one species. With regard to one reference character existing in every specimen, such as “tail bud is formed”, variation of other characters like “somite number” or development of “pharyngeal arches” can be documented for one species. Using empirical methods for analysing intraspecific variability in a phylogenetic context [29–30] the formulas can serve as data matrices.

**3. Twofold Extendibility.** I provide a simple three-part SES-Code (**Figure 2–4**) referring to monophyletic groups, to character complexes, and to defined developmental states of these character complexes (see above). Using this scheme additional clades (i.e. Mammalia, M), character complexes (i.e. hairs, M02) and events, also for existing character complexes (i.e. upper eyelid forms, A01g) can be added. Not only external developmental features, also internal morphological, physiological, genetic or molecular characters in ontogeny can be included into the SES.

**4. Embryological Collections.** Embryological collections are an essential source for research in comparative embryology [73–74]. To quickly ascertain which characters an embryo shows, the SES-formula can be used to list detailed information on a collection object, i.e. when searching for specimens having a “tail bud” [48], a “forelimb bud with AER” [75], or marsupial embryos having ossified forelimb bones in early stages [76].

**5. Common Language in Evo-Devo.** Staging tables of so called “model organisms” like the chicken [16] are commonly used as references in Evo-Devo-research. Staging tables only represent a synopsis of several specimens, which look more or less similar. Intraspecific variability, which is generally ignored in staging tables, may lead to several communication errors. For example, the situation whereby two laboratories work on the same species: Regarding to reference paper X a specimen A is staged as stage X12 in one lab. This specimen processes a specific molecule in the mandibular arch bud. However, members of a second lab do not find this molecule in a specimen B, which is also staged as stage X12. When comparing the presented SES-Formula of these two specimens, it could be recognised that in specimen A the lower eye lid – which was not described in staging reference X – has already developed while in specimen B a lower eyelid has not yet formed. It could be thus inferred that the lower eyelid may influence the processing of the molecule in the species. When discussing molecular features of one specimen, the set of SES-characters as defined here should also be provided for clear communication.

**6. Staging System vs. “Staging Tables”.** When describing a new series of embryos, depending on the extent of material, I suggest to describe only specimens rather than synopses of them (‘Staging Table’ concept of Harrison [15]: several similar specimens summarised to one single stage). In this way topological simplifications can be avoided and variability, crucial in intraspecific development, is not neglected. Terms as previously and typologically used such as ‘Staging Table’ [77] (**Figure 1**), ‘Normal development/stages’ [15,20,78] or simply ‘series of stages’ [34] should be avoided and using at least the SES based

set of characters a new described series of embryos from hereon should be called a “Staging System”. Wanek et al. [79] sensibly used this term before for only two specific and clearly described character complexes: the fore- and hind limb.

## Recommendations on how to use the Standard Event System [SES]

**A. Cataloguing in Collections.** Scientific collections housing embryos simply need to provide a basic check list (**Figure 5**) of SES-characters visible in a specimen (sheet 1 of **Table S1 or 2**). Most collections already have an online database of their catalogued objects. Linked to the listed embryo information, the filled formulas can be made available as a pdf file. Scientists describing embryos from collections may publish complete SES-formulas (**Figure 5–8**) online and connect them to the collection listings.

**B. Documentation in Evo-Devo.** When recording a discrete morphological event (e.g., describing e.g. the onset of gene X expression in limb bud development) a SES-formula could be filled out for each observed specimen. Therefore the check list (**Figure 5**) and at least the first page of illustrated documentation (**Figure 6**) should be filled out (lateral, dorsal, ventral view). More detailed illustration may be added depending on the observed region (only limbs, surrounding area like heart/liver-bulbus etc.). The laboratory poster (**Figure 9, Poster S1**) showing all SES-characters may be used for an exploratory survey when discussing developmental features.

**C. Creating Staging Systems.** I recommend one should describe specimens of an embryonic series instead of typological stage-synopses. Except for some r-strategy species such as the chicken [16], sea turtles [43], diverse fishes [20], frogs [80–81] or crocodiles [82–83] in general only a few embryonic specimens are available for k-strategy vertebrate species [compare **Table S3**]. To describe the external development of embryonic series I suggest the following protocol:

- Ordering:** Primarily, specimens should be ordered by a comparative synopsis of the embryos’ age and the development of reference organs, such as the number of somites, or as often used, the limb bud development [78–79]. In documenting all existing surrounding SES-characters, variability can be managed in a traceable way. The breeding temperature when known should be noted for all non-therian species (**Figure 5**).
- Numbering specimens:** All specimens ordered consecutively should be numbered as specimen 1, specimen 2, specimen 3, specimen 4, specimen 5, etc.
- Coding SES-characters:** The checklist (**Figure 5**) for each specimen could be presented as an appendix to the main descriptive part of the work. If an online data base is established, the checklist information should be entered there. In the main body of the text a full listing of SES-characters as observed in the specimens 1, 2, etc. should be presented.
- Illustration style:** Drawings and photographs should be provided in the proposed style of the formula (lateral, dorsal, ventral view, detailed views of special characters) for each specimen if possible. Drawings/photographs need to show all SES-characters observed in a specimen (**Figure 6**). Additional illustrations are optional, such as raster-electronic-microscopy-scans (**Figure 7**). Illustrations of reference papers may be added to the formula (**Figure 8**). Figure plates should be provided in the main body of the article summarising all SES-stages to obtain an overview of species development.



Authors should be aware of the biases introduced by using different methods to document a particular event and comparing different species. For example, in this study I used light microscopy to record the appearance of the apical epidermal ridge: Perhaps other imaging techniques (e.g., computer-tomography) would detect such an event earlier.

- e) **Additional characters:** Space is provided in the SES-formula to add characters that obviously are identical for only one species, such as colouration, pigmentation, or diverse scale development (Fig 2a: below). In this study I only observed a few mammalian species opposing a broad range of sauropsid species. Because of this low comparability I refrained from listing mammalian specific characters like “hairs on head (M02a)” in the SES-formula. Further studies on vertebrate embryology may provide additional character complexes and events occurring within, which could be coded in the SES-style. For actinopterygian fishes, characters like “number of dorsal fin rays up to five (AC01a)” are imaginable. In an online data base an ongoing discussion and updating of SES-characters and specimens would be possible and desirable.
- f) **Additional specimens:** In the case of species for which only a rare set of embryonic specimens exists as in the case for the echidna *Tachyglossus aculeatus* [1] or the tuatara *Sphenodon punctatus* [84] the study of new embryos may fill some gaps in understanding these series. Given a Staging System of species A with age/somite ordered specimens 1, 2, 3, 4 and 5: When finding a new embryo which is developmentally difficult to settle between specimen 2 and 3 with more similarities to specimen 2, the new specimen is to be named as “specimen 2>3”. If a further specimen is found to be settled between specimen 2 and 3 - having much more similarities to specimen 2 - it should be called “specimen 2>>3”. Although this system would be endlessly extendable, authors could decide to create a new Staging System for the specimen when having much more specimens than previously published.
- g) **Stages vs. specimens:** When having dozens or hundreds of embryos representing an embryonic series [16] it would not be practical to describe each specimen separately. In this case a synopsis has to be used, as previously called normal stages, staging tables (see above). For this I propose the antiquated typological approach, but: Only specimens showing a high degree of similarity – which is measurable and documentable by the composition set of their SES-characters – should be concluded as one synoptic stage. By documenting differences in SES-composition, variability is traceable and its patterns can be calculated afterwards. When describing and illustrating SES-stages the same protocol should be followed with the same diligence as described for the specimen staging approach.

## Ontogeny and Ontology

An online database is necessary to make information of all vertebrate embryos available to the scientific community. Therein image-based as well as tabular presentations of embryological characters are necessary. It is a challenge for bioinformaticians to coordinate the enormous amount of published information on morphological, developmental and molecular data in a traceable way [85–87]. In morphology, for example, several scientific groups developed online databases, such as Digimorph [88], to coordinate and to provide access to the enormous amount of information available. For particular “model organisms” extensive online documentation (including embryology) is already available, such as the Edinburgh mouse atlas project, the *Xenopus*-, *C. elegans*- or

*Drosophila*-project (e.g. summarised by Bio-Ontologies [89]). In addition, several web pages provide a collection of biological ontologies of a molecular and morphological kind such as Bioportal [90] or Obofoundry [91].

Commendable efforts exist to standardise anatomical nomenclature in comparative online-projects such as Phaenoscope [87,92] for teleost fishes or the Morphological web database [93–94] for mammals. The study presented here also aims to set a standard reference for describing developmental anatomical features. It is intended to eventually integrate the SES to an image based internet-ontology (such as MorphDBase [95]), where information and illustrations for new species, new specimens and new SES-characters – verified by results from peer-reviewed publications – can be added individually.

## Methods

### Taxonomic sampling

I examined mostly literature data (**Table S3**) on the external development of 15 turtle species (*Apalone spinifera*, *Caretta caretta*, *Carettochelys insculpta*, *Chelonia mydas*, *Chelydra serpentina*, *Chrysemys picta*, *Dermochelys coriacea*, *Emydura subglobosa*, *Eretmochelys imbricata*, *Graptemys nigrinoda*, *Lepidochelys olivacea*, *Natator depressa*, *Testudo hermanni*, *Trachemys scripta*, *Pelodiscus sinensis*) and eight species out of the major clades of Tetrapoda: *Ambystoma mexicanum* (Lissamphibia), *Tachyglossus aculeatus* (Mammalia, Monotremata), *Didelphis virginiana* (Mammalia, Marsupialia), *Dasyus hybridus* (Mammalia, Placentalia), *Gallus gallus* (Aves), *Alligator mississippiensis* (Crocodylia), *Sphenodon punctatus* (Sphenodontida) and *Lacerta vivipara* (Squamata).

I had access to an embryonic series of the turtles *Emydura subglobosa*, the first pleurodire turtle ever observed in its external embryology [45], and one of *Graptemys nigrinoda* (Cryptodira). For *Caretta caretta*, *Chelonia mydas*, *Lepidochelys olivacea* and *Pelodiscus sinensis* (housed in the collection of Marcelo R. Sánchez-Villagra, Paläontologisches Institut und Museum der Universität Zürich) I expanded the existing information with additional specimens that were staged after the original papers (**Table S3**). The remaining tetrapod species were chosen based on the extent of described stages and the usability of the published figures.

For the echidna, *Tachyglossus aculeatus*, the staging table of Semon [1,96–97] was used, which begins at a stage of 39 somite pairs and ends at a stage where hairs are visible on back and limbs. In the Hubrecht laboratory in Berlin [73–74] I had access to 21 embryo photographs and drawings (made by different scientists), ordered them chronologically by the number of somites, and defined 13 stages prior to the first Semon- and two stages after the last Semon-stage.

### Definition of developmental characters

All characters described in reference papers (**Table S3**) were compared and the availability of each character was scrutinised for all species. Based on this comparison, a simple, easily recognisable list of newly occurring characters during embryogenesis (organogenesis, maturation until hatching/birth) was prepared, defining 104 developmental events (**Figure 2–4**) comprising the following aspects: One egg, one blastula, four neural tube, eleven somite, three general head, two nose, three ear, seven eye, one rib, three heart, one tail, 14 limb, nine scale/scute/feather, one hatch, six maxillary process, eight mandibular process, five pharyngeal arch, five pharyngeal slit, two urogenital papillae, three neck, six eyelid, one egg tooth, one labial and six carapace characters. Most of the characters are generally applicable to all vertebrates.

I refrained from defining characters that, although widespread, involve much subjectivity when coding, or for which the homology cannot be identified (reliability) such as the shape

and development of pigmentation, detailed carapace or scale differentiations – all characters important for staging pre-hatching/pre-birth embryos of a particular species. Although pigmentation and colouration is mentioned in most of the staging tables the first occurrence of pigments cells are in most cases hard to see in photographs and in embryos fixed for a long time. Other authors called an organ pigmented [41], when the organ is completely “dark”. I also refrained from listing every single somite number because there is a high variability in the formation of the mesodermal segments [98]. The presented definition of clusters, five somites each, reflects the variance of somite development in my own observation but because of the arbitrariness of the number chosen (5) is a source of subjectivity.

When defining events for the limb development either both limbs are separately or both are jointly discussed, or only the forelimb was discussed. The forelimb is described more carefully than the hind limb in some works [34] or a generally contemporary development of the features, as I experienced in observing both limbs, is visible [see also 75,99].

If possible both body sides were observed, either in the original specimens or in the pictures. In general I did not find important differences in contralateral development. Nevertheless, if there were slight differences, both sides clearly fit to the same explicit defined event. That is especially mentionable for differing counts of somites, fitting in the same somite cluster. i.e. having 12 somites on the left body side and 13 somites on the right body side: both sides fit to the same somite cluster “11–15” (Figure 2: V04d).

The characters described are illustrated in Figure 2–4; most drawings are modified from Guyout et al. [40], Renous et al. [44] and Mahmoud et al. [100]. These studies present detailed and useful depictions of characters used in the staging guide I present here. Nomenclature mainly follows that of Schoenwolf [101].

## References

- Semon R (1894c) Zur Entwicklungsgeschichte der Monotremen. Denkschriften der Medicinisch-Naturwissenschaftlichen Gesellschaft zu Jena 5: 61–74. Cited quote: “Dieses Thema werde ich ganz kurz behandeln, denn es erscheint mir überflüssig, Dinge ausführlich mit Worten zu beschreiben, die einem jeden ohne weiteres bei Betrachtung der Abbildungen [...] in die Augen springen.”
- Müller WA, Hassel M (2003) Entwicklungsbiologie und Reproduktionsbiologie von Mensch und Tier: ein einführendes Lehrbuch. Berlin: Springer-Verlag.
- Gilbert SF (2006) Developmental Biology. Sunderland, Mass.: Sinauer Associates.
- Wolpert L, Jessell T, Lawrence P, Meyerowitz E, Robertson E, et al. (2007) Principles of Development. Oxford, New York: Oxford University Press.
- Smith KK (1997) Comparative patterns of craniofacial development in eutherian and metatherian mammals. *Evolution* 51: 1663–1678.
- Jeffery JE, Bininda-Emonds ORP, Coates MI, Richardson MK (2002) Analyzing evolutionary patterns in amniote embryonic development. *Evolution & Development* 4: 292–302.
- Jeffery JE, Bininda-Emonds ORP, Coates MI, Richardson MK (2005) A new technique for identifying sequence heterochrony. *Systematic Biology* 54: 230–240.
- Harrison L, Larsson H (2008) Estimating evolution of temporal sequence changes: a practical approach to inferring ancestral developmental sequences and sequence heterochrony. *Systematic Biology* 57: 378–387.
- Soemmerring ST (1799) *Icones embryonum humanorum* Frankfurt am Main: Varrentrapp und Wenner.
- Hopwood N (2007) A history of normal plates, tables and stages in vertebrate embryology. *International Journal of Developmental Biology* 51: 1–26.
- His W (1885) *Anatomie menschlicher Embryonen*. Leipzig: Vogel.
- Oppel A (1891) Vergleichung des Entwicklungsgrades der Organe zu verschiedenen Entwicklungszeiten bei Wirbeltieren. Jena: Fischer.
- Keibel F (1897) *Normentafel zur Entwicklungsgeschichte des Schweines (Sus scrofa domestica)*. Jena: Fischer.
- Hopwood N (2005) Visual standards and disciplinary change: Normal plates, tables and stages in embryology. *History of Science* 43: 239–303.
- Harrison RG (1969) Harrison stages and description of the normal development of the Spotted Salamander, *Ambystoma punctatum* (Linn.). In: Wilens S, ed. *Organisation and Development of the Embryo*. New Haven, London: Yale University Press. pp 44–66.
- Hamburger V, Hamilton HL (1951) A series of normal stages in the development of the chick embryo. *Journal of Morphology* 88: 49–92.
- Mitgutsch C (2003) On Carl Gegenbaur’s theory on head metamerism and the selection of taxa for comparisons. *Theory Biosci* 122: 204–229.
- Sellier N, Brillard J-P, Dupuy V, Bakst MR (2006) Comparative staging of embryo development in chicken, turkey, duck, goose, Guinea fowl, and Japanese quail assessed from five hours after fertilization through seventy-two hours of incubation. *J Appl Poult Res* 15: 219–228.
- Jenner RA, Wills MA (2007) The choice of model organisms in evo-devo. *Nature Reviews/Genetics* 8: 311–319.
- Iwamatsu T (2004) Stages of normal development in the medaka *Oryzias latipes*. *Mechanisms of Development* 121: 605–618.
- Ballard WW, Mellinger J, Lechenault H (1993) A series of normal stages for development of *Scyliorhinus canicula*, the lesser spotted dogfish (Chondrichthyes: Scyliorhinidae). *Journal of Experimental Biology* 267: 318–336.
- Cretokos CJ, Weatherbee SD, Chen C-H, Badwaik NK, Niswander L, et al. (2005) Embryonic staging system for the short-tailed fruit bat, *Carollia perspicillata*, a model organism for the mammalian order Chiroptera, based upon timed pregnancies in captive-bred animals. *Developmental Dynamics* 233: 721–738.
- Sanger TJ, Losos JB, Gibson-Brown JJ (2008) A developmental staging series for the lizard genus *Anolis*: A new system for the integration of evolution, development, and ecology. *Journal of Morphology* 269: 129–137.
- Mabee P, Trendler T (1996) Development of the Cranium and Paired Fins in *Betta splendens* (Teleostei: Percormorpha): Intraspecific Variation and interspecific Comparisons. *Journal of Morphology*. pp 249–287.
- Velhagen WA Jr (1997) Analyzing developmental sequences using sequence units. *Syst Biol* 46: 204–210.
- Schlosser G (2001) Using Heterochrony Plots to Detect the Dissociated Coevolution of Characters. *Journal of Experimental Zoology (Mol Dev Evol)* 291: 282–304.
- Schulmeister S, Wheeler WC (2004) Comparative and phylogenetic analysis of developmental sequences. *Evolution & Development* 6: 50–57.
- Bininda-Emonds ORP, Jeffery JE, Coates MI, Richardson MK (2002) From Haeckel to event-pairing: the evolution of developmental sequences. *Theory Biosci* 121: 297–320.

## Supporting Information

**Table S1** Template of a SES-formula to document developmental series and embryo specimens (in doc-format).

Found at: doi:10.1371/journal.pone.0005887.s001 (0.16 MB DOC)

**Table S2** Template of a SES-formula to document developmental series and embryo specimens (in pdf-format)

Found at: doi:10.1371/journal.pone.0005887.s002 (0.06 MB PDF)

**Table S3** Species used in this study.

Found at: doi:10.1371/journal.pone.0005887.s003 (2.27 MB PDF)

**Poster S1** Template for printing the illustrated standard characters in a poster format.

Found at: doi:10.1371/journal.pone.0005887.s004 (20.49 MB PDF)

## Acknowledgments

Special thanks to Marcelo R. Sánchez-Villagra for supporting this research and for discussion. Christian Mitgutsch took photographs of *Chelonia mydas*. For organising specimens I am grateful to Johannes Müller (*Emydura subglobosa*), Marcelo R. Sánchez-Villagra (*Caretta caretta*, *Chelonia mydas*, and *Lepidochelys olivacea*), Lennart Olsson and Janine M. Ziermann (*Graptomys nigrinoda*) as well as to Peter Giere (Hubrecht/Hill-collection, Naturkundemuseum Berlin, *Tachyglossus aculeatus*). I thank Laura Wilson, Torsten Scheyer, two anonymous reviewers and Vincent Laudet, and especially Christian Mitgutsch for discussion and useful comments to the manuscript.

## Author Contributions

Conceived and designed the experiments: IW. Performed the experiments: IW. Analyzed the data: IW. Wrote the paper: IW.

29. Mabee PM, Olmstead KL, Cabbage CC (2000) An experimental study of intraspecific variation, developmental timing, and heterochrony in fishes. *Evolution* 54: 2091–2106.
30. Colbert MW, Rowe T (2008) Ontogenetic sequence analysis: Using parsimony to characterize developmental sequences and sequence polymorphism. *Journal of Experimental Zoology (Mol Dev Evol)* 310B: page range.
31. Agassiz L (1857) *Contributions to the Natural History of the United States of America*. Boston, London: Little, Brown and company/Truebner & Co.
32. Rathke H (1848) *Ueber die Entwicklung der Schildkröten*. Braunschweig: Druck und Verlag von Friedrich Vieweg und Sohn.
33. Parker WK (1880) Report on the development of the green turtle (*Chelone viridis*, Schneid.). Green: London Longmans. pp 1–57.
34. Yntema CL (1968) A series of stages in the embryonic development of *Chelydra serpentina*. *Journal of Morphology* 125: 219–251.
35. Sánchez-Villagra MR, Winkler JD, Wurst L (2007) Autopodial skeleton evolution in side-necked turtles (Pleurodira). *Acta Zoologica (Stockholm)* 88: 199–209.
36. Sánchez-Villagra MR, Mitgutsch C, Nagashima H, Kuratani S (2007) Autopodial development in the sea turtles *Chelonia mydas* and *Caretta caretta*. *Zoological Science* 24: 257–263.
37. Sánchez-Villagra MR, Ziermann JM, Olsson L (2008) Limb chondrogenesis in *Graptemys nigripada* (Emydidae), with comments on the primary axis and the digital arch in turtles. *Amphibia-Reptilia* 19: 85–92.
38. Greenbaum E (2002) A standardized series of embryonic stages for the emydid turtle *Trachemys scripta*. *Canadian Journal of Zoology* 80: 1350–1370.
39. Tokita M, Kuratani S (2001) Normal embryonic stages of the Chinese softshelled turtle *Pelodiscus sinensis* (Trionychidae). *Zoological Science* 18: 705–715.
40. Guyot G, Pieau C, Renous S (1994) Développement embryonnaire d'une tortue terrestre, la tortue d'Hermann, *Testudo hermanni* Gmelin, 1789. *Annales des Sciences Naturelles Zoologie Paris* 15: 115–137.
41. Beggs K, Young J, Georges A, West P (2000) Ageing the eggs and embryos of the pig-nosed turtle, *Carettochelys insculpta* (Chelonia: Carettochelydidae), from northern Australia. *Canadian Journal of Zoology* 78: 373–392.
42. Greenbaum E, Carr JL (2002) Staging criteria for embryos of the spiny softshell turtle, *Apalone spinifer* (Testudines: Trionychidae). *Journal of Morphology* 254: 272–291.
43. Miller JD (1985) Embryology of marine turtles. In: Gans C, Billet F, Maderson PFA, eds. *Biology of the Reptilia Volume 14 - Development A*. New York: John Wiley & Sons. pp 269–328.
44. Renous S, Rimblot-Baly F, Fretey J, Pieau C (1989) Caractéristique du développement embryonnaire de la tortue luth, *Dermochelys coriacea* (Vandelli, 1761). *Annales des Sciences Naturelles Zoologie Paris* 10: 197–229.
45. Werneburg I, Sánchez-Villagra MR (2009) Timing of organogenesis support basal position of turtles in the amniote tree of life. *BMC Evolutionary Biology* 9: 82. Available: <http://www.biomedcentral.com/1471-2148/9/82>. Accessed 2009 Apr 23.
46. Mehnert E (1897) Kainogenese. Eine gesetzmässige Abänderung der embryonalen Entfaltung in Folge von erblicher Uebertragung in der Phylogese erworbener Eigentümlichkeiten. *Morphologische Arbeiten* 7: 1–156.
47. Crastz F (1982) Embryological stages of the marine turtle *Lepidochelys olivacea*. *Rev Biol Trop* 30: 113–120.
48. Richardson MK, Hanken J, Gooneratne ML, Pieau C, Raynaud A, et al. (1997) There is no highly conserved embryonic stage in the vertebrates: implications for current theories of evolution and development. *Anat Embryol* 196: 91–106.
49. Richardson MK (1995) Heterochrony and the Phylotypic Period. *Developmental Biology* 172: 412–421.
50. Richardson MK, Minelli A, Coates MI (1999) Some problems with typological thinking in evolution and development. *Evolution & Development* 1: 5–7.
51. von Baer KE (1828) *Entwicklungsgeschichte der Thiere, Beobachtung und Reflexion*. Königsberg: Bornträger.
52. Haeckel E (1868) *Natürliche Schöpfungsgeschichte*. Berlin: Georg Reimer.
53. Haeckel E (1874) *Anthropogenie oder Entwicklungsgeschichte des Menschen*. Leipzig: Engelmann.
54. Hall BK (1997) Phylotypic stage or phantom: is there a highly conserved embryonic stage in vertebrates? *Trends in Ecology and Evolution* 12: 461–463.
55. Haeckel E (1896) *Systematische Phylogenie*. Zweiter Theil, Systematische Phylogenie der wirbellosen Thiere (Invertebrata). Berlin: Georg Reimer.
56. Richardson MK, Keuck G (2001) A question of intent: when is a schematic illustration a fraud? *Nature* 410: 144.
57. Richardson MK, Keuck G (2002) Haeckel's ABC of evolution and development. *Biol Rev* 77: 495–528.
58. Richardson MK, Jeffery JE, Coates MI, Bininda-Emonds ORP (2001) Comparative methods in developmental biology. *Zoology* 104: 278–283.
59. Richardson MK, Verbeek FJ (2003) New directions in comparative embryology and the nature of developmental characters. *Animal Biology* 53: 303–311.
60. Ziermann JM (2008) Evolutionäre Entwicklung larvaler Cranialmuskulatur der Anura und der Einfluss von Sequenzheterochronien [PhD-thesis]. Jena: Friedrich-Schiller-Universität. 347 p.
61. Schoch RR (2006) Skull ontogeny: developmental patterns of fishes conserved across major tetrapod clades. *Evolution & Development* 8: 524–536.
62. Smirhwaite JJ, Rundle SD, Bininda-Emonds ORP, Spicer JI (2007) An integrative approach identifies developmental sequence heterochronies in freshwater basommatophoran snails. *Evolution & Development* 9: 122–130.
63. Fišer C, Bininda-Emonds ORP, Blejce A, Sket B (2008) Can heterochrony help explain the high morphological diversity within the genus *Niphargus* (Crustacea: Amphipoda)? *Organisms, Diversity & Evolution* 8: 146–162.
64. Mitgutsch C, Piekarski N, Olsson L, Haas A (2007) Heterochronic shifts during early cranial neural crest cell migration in two ranid frogs. *Acta Zoologica* 88: 69–78.
65. Mitgutsch C, Olsson L, Haas A (in press) Early embryogenesis in discoglossoid frogs: a study of heterochrony at different taxonomic levels. *Journal of Zoological Systematics & Evolutionary Research*.
66. Maxwell EE, Harrison LB (2008) Ossification sequence of the common tern (*Sterna hirundo*) and its implications for the interrelationships of the Iari (Aves, Charadriiformes). *Journal of Morphology* 269: 1056–1072.
67. Sánchez-Villagra MR, Goswami A, Weisbecker V, Mock O, Kuratani S (2008) Conserved relative timing of cranial ossification patterns in early mammalian evolution. *Evolution & Development* 10: 519–530.
68. Weisbecker V, Goswami A, Wroe S, Sánchez-Villagra MR (2008) Ossification heterochrony in the mammalian postcranial skeleton and the marsupial-placental dichotomy. *Evolution* 62: 2027–2041.
69. Wilson LAB, Sánchez-Villagra MR (2009) Heterochrony and patterns of ectocranial suture closure in hystricognath rodents. *Journal of Anatomy* 214: 339–354.
70. Romeis B (1989) *Romeis Mikroskopische Technik*; Böck P, ed. München, Wien, Baltimore: Urban und Schwarzenberg.
71. Chipman AD, Haas A, Tchernov E, Khaner O (2000) Variation in anuran embryogenesis: Differences in sequence and timing of early developmental events. *Journal of Experimental Zoology* 288: 352–365.
72. Bininda-Emonds ORP, Jeffery JE, Richardson MK (2003) Inverting the hourglass: quantitative evidence against the phylotypic stage in vertebrate development. *Proc R Soc Lond B* 270: 341–346.
73. Richardson MK, Narraway J (1999) A treasure house of comparative embryology. *Int J Dev Biol* 43: 591–602.
74. Giere P, Zeller U (2006) *Die Embryologische Sammlung/The embryological collection*. Museum für Naturkunde der Humboldt-Universität zu Berlin Annual Report Jahresbericht 2006: 15.
75. Bininda-Emonds ORP, Jeffery JE, Sánchez-Villagra MR, Hanken J, Colbert M, et al. (2007) Forelimb-hind limb developmental timing across tetrapods. *BMC Evolutionary Biology* 7: 108. Available: <http://www.biomedcentral.com/1471-2148/7/108>. Accessed 2007 Oct 1.
76. Sánchez-Villagra MR (2002) Comparative patterns of postcranial ontogeny in therian mammals: an analysis of relative timing of ossification events. *Journal of Experimental Zoology (Mol Dev Evol)* 294: 264–273.
77. Dufaure JP, Hubert J (1961) Table de développement du lézard vivipara: *Lacerta (Zootoca) vivipara*. *Archives D'Anatomie Microscopique et de Morphologie Expérimentale* 50: 307–327.
78. Nye HLD, Cameron JA, Chernoff E-AG, Stocum L (2003) Extending the table of stages of normal development of Axolotl: Limb development. *Developmental Dynamics* 226: 555–560.
79. Wanek N, Muneoka K, Holler-Dinsmore G, Burton R, Bryant SV (1989) A staging system for mouse limb development. *The Journal of Experimental Zoology* 249: 41–49.
80. Gosner KL (1960) A simplified table for staging anuran embryos and larvae with notes on identification. *Herpetologica* 16: 183–190.
81. Ziermann JM, Olsson L (2007) Patterns of spatial and temporal cranial muscle development in the african clawed frog, *Xenopus laevis* (Anura: Pipidae). *Journal of Morphology* 268: 791–804.
82. Ferguson MWJ (1985) Reproductive biology and embryology of the crocodylians. In: Gans C, Billet F, Maderson PFA, eds. *Biology of the Reptilia Volume 14 - Development A*. New York: John Wiley & Sons. pp 329–491.
83. Voeltzkow A (1899) Beiträge zur Entwicklungsgeschichte der Reptilien. I. Biologie und Entwicklung der äußeren Körperform von *Crocodilus madagascariensis*. *Abhandlungen der Senckenbergischen Naturforschenden Gesellschaft* 26: 1–150.
84. Dendy A (1899) Outlines of the Development of the Tuatara, *Sphenodon (Hatteria) punctatus*. *Quarterly Journal of Microscopical Science* s2-42: 1–87.
85. Bodenreider O, Stevens R (2006) Bio-ontologies: current trends and future directions. *Brief Bioinform* 7: 256–274.
86. Burger A, Davidson D, Baldock R (2007) *Anatomy Ontologies for Bioinformatics. Principles and Practice*. London: Springer.
87. Mabee PM, Ashburner M, Cronk Q, Gkoutos GV, Haendel M, et al. (2007) Phenotype ontologies: the bridge between genomics and evolution. *Trends in Ecology & Evolution* 22: 345–350.
88. Digimorph: [www.digimorph.org/](http://www.digimorph.org/).
89. Bio-Ontologies: <http://anil.cchmc.org/Bio-Ontologies.html>.
90. Biportal: <http://biportal.bioontology.org/>.
91. Obofoundry: [www.obofoundry.org/](http://www.obofoundry.org/).
92. Phaenoscapes project: [www.nescent.org/phaenoscapes/Main\\_Page](http://www.nescent.org/phaenoscapes/Main_Page).
93. Asher RJ (2007) A web-database of mammalian morphology and a reanalysis of placental phylogeny. *BMC Evolutionary Biology* 7: 108. Available: <http://www.biomedcentral.com/1471-2148/7/108/abstract> Accessed: 2007 Jul 3.
94. Morphological web database: [http://people.pw.cam.ac.uk/rja58/database/morphsite\\_bmc07.html](http://people.pw.cam.ac.uk/rja58/database/morphsite_bmc07.html).

95. MorphDBase: [www.morphdbase.de](http://www.morphdbase.de).
96. Semon R (1894a) Beobachtungen über die Lebensweise und Fortpflanzung der Monotremen nebst Notizen über ihre Körpertemperatur. Denkschriften der Medicinisch-Naturwissenschaftlichen Gesellschaft zu Jena 5: 3–15.
97. Semon R (1894b) Die Embryonalhüllen der Monotremen und Marsupialier. Denkschriften der Medicinisch-Naturwissenschaftlichen Gesellschaft zu Jena 5: 19–58.
98. Richardson MK, Allen SP, Wright GM, Raynaud A, Hanken J (1998) Somite number and vertebrate evolution. *Development* 125: 151–160.
99. Richardson MK, Gobes S, van Leeuwen A, Poelman A, Pieau C, et al. (2009) Heterochrony in limb evolution: developmental mechanisms and natural selection. *Journal of Experimental Zoology (Mol Dev Evol)* 310B: page range.
100. Mahmoud IY, Hess GL, Klicka J (1973) Normal Embryonic Stages of the Western Painted Turtle, *Chrysemys picta bellii*. *J Morph* 141: 268–280.
101. Schoenwolf GC (2008) *Atlas of descriptive embryology*. San Francisco: Pearson Education. pp 125–195.
