# Supplementary material for: A Standard System to Study Vertebrate Embryos
Source: PubMed Central journal article supplement (PMC2693928; doi:10.1371/journal.pone.0005887), 2009-06-12
Supplement: pone.0005887.s002.pdf [file pone.0005887.s002.pdf]

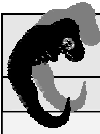

## Standard Event System for Vertebrate Embryology

|                        |                       |                           |     |
|------------------------|-----------------------|---------------------------|-----|
| <b>species (group)</b> | <b>stage/specimen</b> | <b>specimen/stage No.</b> |     |
|                        | <b>breeding temp.</b> | <b>collection No.</b>     |     |
|                        | <b>age (days)</b>     | <b>sheet No.</b>          | 1 / |

| CC                 | SEC                            | SE                           | ↓    | CC                         | SEC                      | SE                               | ↓                 |  |
|--------------------|--------------------------------|------------------------------|------|----------------------------|--------------------------|----------------------------------|-------------------|--|
| <b>egg</b>         | V01a                           | egg lay                      |      |                            | V13a                     | head scales                      |                   |  |
| <b>blastula</b>    | V02a                           | blastoporus                  |      |                            | V13b                     | throat scales                    |                   |  |
| <b>neural tube</b> | V03a                           | primitive streak             |      | <b>scales/etc.</b>         | V13c                     | eyelid scales                    |                   |  |
|                    | V03b                           | neural folds closure         |      |                            | V13d                     | neck scales                      |                   |  |
|                    | V03c                           | anterior neuropore closed    |      |                            | V13e                     | back scales                      |                   |  |
|                    | V03d                           | posterior neuropore closed   |      |                            | V13f                     | limb scales                      |                   |  |
| <b>somites</b>     | V04a                           | somites hard count           |      |                            | V13g                     | whole forelimb scales            |                   |  |
|                    | V04b                           | 1-5 somite pairs             |      |                            | V13h                     | tail scales                      |                   |  |
|                    | V04c                           | 6-10 somite pairs            |      |                            | V13i                     | carapace scutes                  |                   |  |
|                    | V04d                           | 11-15 somite pairs           |      |                            | <b>hatch</b>             | V14a                             | hatch             |  |
|                    | V04e                           | 16-20 somite pairs           |      |                            | <b>maxillary process</b> | G01a                             | max bud           |  |
|                    | V04f                           | 21-25 somite pairs           |      |                            |                          | G01b                             | max posterior eye |  |
|                    | V04g                           | 26-30 somite pairs           |      |                            |                          | G01c                             | max midline eye   |  |
|                    | V04h                           | 31-35 somite pairs           |      |                            |                          | G01d                             | max anterior lens |  |
|                    | V04i                           | 36-40 somite pairs           |      |                            |                          | G01e                             | max anterior eye  |  |
|                    | V04j                           | 41-45 somite pairs           |      | G01f                       |                          | max frontonasal fuse             |                   |  |
| <b>head</b>        | V04k                           | 46-50 somite pairs           |      | G02a                       | mand arch bud            |                                  |                   |  |
|                    | V05a                           | head bulbus                  |      | <b>mandibular process</b>  | G02b                     | mand posterior eye               |                   |  |
|                    | V05b                           | anterior cephalic projection |      |                            | G02c                     | mand posterior lens              |                   |  |
| V05c               | head projection disappeared    |                              | G02d |                            | mand midline eye         |                                  |                   |  |
| <b>nose</b>        | V06a                           | olfactory pit                |      |                            | G02e                     | mand anterior lens               |                   |  |
|                    | V06b                           | external nares               |      |                            | G02f                     | mand anterior eye                |                   |  |
| <b>ear</b>         | V07a                           | otic pit                     |      |                            | G02g                     | mand level frontonasal           |                   |  |
|                    | V07b                           | otic vesicle                 |      |                            | G02g                     | mand occlusion point             |                   |  |
|                    | V07c                           | otic capsule inconspicuous   |      | <b>pharyngeal arches</b>   | G03a                     | 2nd arch                         |                   |  |
| <b>eye</b>         | V08a                           | optic vesicle                |      |                            | G03b                     | 3rd arch                         |                   |  |
|                    | V08b                           | lens vesicle                 |      |                            | G03c                     | 4th arch                         |                   |  |
|                    | V08c                           | optic fissure                |      |                            | G03d                     | 5th arch                         |                   |  |
|                    | V08d                           | contour lens/iris            |      |                            | G03e                     | hyoid flap                       |                   |  |
|                    | V08e                           | pupil forms                  |      | <b>pharyngeal slits</b>    | G04a                     | 1st slit                         |                   |  |
|                    | V08f                           | scleral papillae             |      |                            | G04b                     | 2nd slit                         |                   |  |
| V08g               | scleral papillae inconspicuous |                              | G04c |                            | 3rd slit                 |                                  |                   |  |
| <b>ribs</b>        | V09a                           | rib primordia                |      |                            | G04d                     | 4th slit                         |                   |  |
| <b>heart</b>       | V10a                           | Ventricle bulbus             |      | G04e                       | slits closed             |                                  |                   |  |
|                    | V10b                           | thoracal bulbus disappeared  |      | <b>urogenital papillae</b> | G05a                     | urogenital papilla bud           |                   |  |
|                    | V10c                           | ventricle S-shaped           |      |                            | G05b                     | urogenital papilla inconspicuous |                   |  |
| <b>tail</b>        | V11a                           | tail bud                     |      | <b>neck</b>                | T01a                     | cervical flexure 90°             |                   |  |
| <b>limbs</b>       | V12a                           | forelimb ridge               |      |                            | T01b                     | cervical flexure disappeared     |                   |  |
|                    | V12b                           | forelimb bud                 |      |                            | T01c                     | wrinkles on neck                 |                   |  |
|                    | V12c                           | forelimb elongated           |      | <b>eye lids</b>            | A01a                     | lower lid                        |                   |  |
|                    | V12d                           | forelimb AER                 |      |                            | A01b                     | eyelid begun overgrow            |                   |  |
|                    | V12e                           | hindlimb AER                 |      |                            | A01c                     | eyelid at scleral papillae       |                   |  |
|                    | V12f                           | forelimb elbow               |      |                            | A01d                     | eyelid ventral lens              |                   |  |
|                    | V12g                           | forelimb paddle              |      |                            | A01e                     | eyelid half eye                  |                   |  |
|                    | V12h                           | hindlimb paddle              |      |                            | A01f                     | membrana nictitans               |                   |  |
|                    | V12i                           | forelimb digital plate       |      | <b>caruncle</b>            | A02a                     | caruncle                         |                   |  |
|                    | V12j                           | hindlimb digital plate       |      | <b>ramphothecae</b>        | S01a                     | ramphothecae                     |                   |  |
|                    | V12k                           | digital grooves              |      |                            | S02a                     | carapacial ridge                 |                   |  |
|                    | V12l                           | digital serration            |      |                            | S02b                     | longitudinal carapacial ridge    |                   |  |
|                    | V12m                           | finger                       |      |                            | S02c                     | carapace not anterior            |                   |  |
|                    | V12n                           | first claw                   |      |                            | S02d                     | carapace clearly limited         |                   |  |
|                    |                                |                              | S02e |                            | carapace beyond tail     |                                  |                   |  |
|                    |                                |                              | S02f | carapace irregular         |                          |                                  |                   |  |

**Legend:** ↓ = mark the existing characters here as x

**notes**

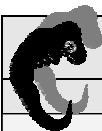

## Standard Event System for Vertebrate Embryology

|                        |                       |  |                           |     |
|------------------------|-----------------------|--|---------------------------|-----|
| <b>species (group)</b> | <b>stage/specimen</b> |  | <b>specimen/stage No.</b> |     |
|                        | <b>breeding temp.</b> |  | <b>collection No.</b>     |     |
|                        | <b>age (days)</b>     |  | <b>sheet No.</b>          | 2 / |

| drawings / photographs / references |                                                        |
|-------------------------------------|--------------------------------------------------------|
| lateral view                        | detailed views,<br>related pictures<br>from literature |
| dorsal view                         |                                                        |
| ventral view                        |                                                        |

Fig. F1:



## Standard Event System for Vertebrate Embryology

|                        |                       |  |                           |   |
|------------------------|-----------------------|--|---------------------------|---|
| <b>species (group)</b> | <b>stage/specimen</b> |  | <b>specimen/stage No.</b> |   |
|                        | <b>breeding temp.</b> |  | <b>collection No.</b>     |   |
|                        | <b>age (days)</b>     |  | <b>sheet No.</b>          | / |

**drawings / photographs / references**
