# Supplementary material for: A Standard System to Study Vertebrate Embryos
Source: PubMed Central journal article supplement (PMC2693928; doi:10.1371/journal.pone.0005887), 2009-06-12
Supplement: pone.0005887.s003.pdf [file pone.0005887.s003.pdf]

**Table S3: Species used in this study.**

| No | classification                       | species                                              | Reference (main references underlined)                                                            | observed specimens           | described stages (followed staging table: stages)                                    | stages since (incl. blastoporus [documented as pictures]) |
|----|--------------------------------------|------------------------------------------------------|---------------------------------------------------------------------------------------------------|------------------------------|--------------------------------------------------------------------------------------|-----------------------------------------------------------|
| 1  | Caudata                              | <i>Ambystoma mexicanum</i>                           | <u>1. Bordzilovskaya et al. (1989)</u> (stages 1-44), <u>2. Nye et al. (2003)</u> (stages 45-57)  | n.d.                         | 51 stages including "half stages" (Bordzilovskaya et al. 1989); 13 (Nye et al. 2003) | 42 [42] +13 [13]                                          |
| 2  | Mammalia, Monotremata                | <i>Tachyglossus aculeatus</i>                        | <u>1. this study</u> (stages IW1-13, Semon-54,55)<br><u>2. Semon (1894a, b, c)</u> (stages 40-53) | 1. 22<br>2. n. d.            | 14 (this study: IW1-13, Semon 54), 14 (Semon 1894c: 40-53)                           | 13 [13] + 14 [14]                                         |
| 3  | Mammalia, Theria, Marsupialia        | <i>Didelphis virginiana</i>                          | <u>McCrandy (1938)</u>                                                                            | n.d.                         | 35 (McCrandy 1938: 1-35)                                                             | 20 [20]                                                   |
| 4  | Mammalia, Placentalia                | <i>Dasyurus hybridus</i> (= <i>Tatusia hybrida</i> ) | <u>Fernandez (1915)</u>                                                                           | 206+                         | 35 (Fernandez 1915: 1-35)                                                            | 24 [21]                                                   |
| 5  | Archosauria, Aves                    | <i>Gallus gallus</i>                                 | <u>Hamburger &amp; Hamilton (1951)</u>                                                            | 996+                         | 45 (Hamburger & Hamilton 1951: 1-45)                                                 | 44 [44]                                                   |
| 6  | Archosauria, Crocodylia              | <i>Alligator mississippiensis</i>                    | <u>1. Ferguson (1985)</u><br><u>2. Voeltzkow (1899)</u>                                           | 1. 1500<br>2. n.d.           | 4 early stages (after Voeltzkow 1899), 28 (Ferguson 1985: 1-28)                      | 32 [32]                                                   |
| 7  | Lepidosauria, Sphenodontida          | <i>Sphenodon punctatus</i>                           | <u>1. Dendy (1899)</u><br><u>2. Moffat (1985)</u>                                                 | 1. 90<br>2. n.d.             | 16 (Dendy 1899: C-S)                                                                 | 16 [15]                                                   |
| 8  | Lepidosauria, Squamata               | <i>Lacerta vivipara</i>                              | <u>1. Dufaure &amp; Hubert (1961)</u><br><u>2. Hubert (1985)</u><br><u>3. Moffat (1985)</u>       | 1. 350<br>2. n.d.<br>3. n.d. | 40 (Dufaure & Hubert 1961: 1-40)                                                     | 36 [36]                                                   |
| 9  | Testudines, Cryptodira, Chelonioidae | <i>Caretta caretta</i>                               | <u>1. Billett et al. (1992)</u><br><u>2. Miller (1985)</u><br><u>3. this study</u>                | 1. n.d.<br>2. 1303<br>3. 5   | 31 (Miller 1985: 1-31)                                                               | 22 [20]                                                   |
| 10 | Testudines, Cryptodira, Chelonioidae | <i>Chelonia mydas</i>                                | <u>1. Miller (1985)</u><br><u>2. Parker (1880)</u><br><u>3. this study</u>                        | 1. 723<br>2. 26+<br>3. 18    | 31 (Miller 1985: 1-31)                                                               | 22 [19]                                                   |
| 11 | Testudines, Cryptodira, Chelonioidae | <i>Dermochelys coriacea</i>                          | <u>Renous et al. (1989)</u>                                                                       | 97+                          | 31 (Miller 1985: 1-31)                                                               | 22 [22]                                                   |
| 12 | Testudines, Cryptodira, Chelonioidae | <i>Eretmochelys imbricata</i>                        | <u>Miller (1985)</u>                                                                              | 567                          | 31 (Miller 1985: 1-31)                                                               | 22 [12]                                                   |
| 13 | Testudines, Cryptodira, Chelonioidae | <i>Lepidochelys olivacea</i>                         | <u>1. Crastz (1982)</u><br><u>2. this study</u>                                                   | 1. 210<br>2. 28              | 31 (Crastz 1982: 1-31)                                                               | 31 [28]                                                   |
| 14 | Testudines, Cryptodira, Chelonioidae | <i>Natator depressa</i>                              | <u>Miller (1985)</u>                                                                              | 375                          | 31 (Miller 1985: 1-31)                                                               | 22 [10]                                                   |
| 15 | Testudines, Cryptodira, Chelydridae  | <i>Chelydra serpentina</i>                           | <u>Yntema (1968)</u>                                                                              | Not noted                    | 27 (Yntema 1968: 0-26)                                                               | 27 [27]                                                   |
| 16 | Testudines, Cryptodira, Emydidae     | <i>Chrysemys picta</i>                               | <u>Mahmoud et al. (1973)</u>                                                                      | 446                          | 23 (Mahmoud et al. 1973: 1-23)                                                       | 23 [23]                                                   |
| 17 | Testudines, Cryptodira, Emydidae     | <i>Graptemys agrionoda</i>                           | <u>this study</u>                                                                                 | 35                           | 14 (Yntema 1968: 12-15, 17-26)                                                       | 14 [14]                                                   |
| 18 | Testudines, Cryptodira, Emydidae     | <i>Trachemys scripta</i>                             | <u>Greenbaum (2002)</u>                                                                           | 104                          | 15 (Yntema 1968: 12-26)                                                              | 15 [15]                                                   |
| 19 | Testudines, Cryptodira, Testudinidae | <i>Testudo hermanni</i>                              | <u>Guyot et al. (1994)</u>                                                                        | 161                          | 27 (Yntema 1968: 0/1-26)                                                             | 27 [27]                                                   |
| 20 | Testudines, Trionychia               | <i>Apalone spinifera</i>                             | <u>Greenbaum &amp; Carr (2002)</u>                                                                | 112                          | 15 (Yntema 1968: 12-26)                                                              | 15 [14]                                                   |
| 21 | Testudines, Trionychia               | <i>Carettochelys insculpta</i>                       | <u>Beggs et al. (2000)</u>                                                                        | 54                           | 15 (Yntema 1968: 12-26)                                                              | 15 [15]                                                   |
| 22 | Testudines, Trionychia               | <i>Pelodiscus sinensis</i>                           | <u>1. Tokita &amp; Kuratani (2001)</u><br><u>2. this study</u>                                    | 1. 67<br>2. 6                | 23 (Tokita & Kuratani 2001: 5-27)                                                    | 23 [23]                                                   |
| 23 | Testudines, Pleurodira               | <i>Emydura subglobosa</i>                            | <u>this study</u>                                                                                 | 18                           | 14 (Yntema 1968: 12-15, 17-26)                                                       | 14 [14]                                                   |

**References to Table S3:**

Beggs K, Young J, Georges A, West P (2000) Ageing the eggs and embryos of the pig-nosed turtle, *Carettochelys insculpta* (Chelonia: Carettochelydidae), from northern Australia. Canadian Journal of Zoology 78: 373-392.

Bordzilovskaya NP, Dettlaff TA, Huhon ST, Malacinski GM (1989) Developmental-stage series of Axolotl embryos. In: Armstrong JB, Malacinski GM, editors. Developmental biology of the Axolotl. New York, Oxford: Oxford University Press. pp. 201-219.

Crastz F (1982) Embryological stages of the marine turtle *Lepidochelys olivacea*. Rev Biol Trop 30: 113-120.

Dendy A (1899) Outlines of the Development of the Tuatara, *Sphenodon (Hatteria) punctatus*. Quarterly Journal of Microscopical Science s2-42: 1-87.

Dufaure JP, Hubert J (1961) Table de développement du lézard vivipara: *Lacerta (Zootoca) vivipara*. Archives D'Anatomie Microscopique et de Morphologie Expérimentale 50: 307-327.

Ferguson MWJ (1985) Reproductive biology and embryology of the crocodylians. In: Gans C, Billet F, Maderson PFA, editors. Biology of the Reptilia Volume 14 - Development A. New York: John Wiley & Sons. pp. 329-491.

Fernandez M (1915) Die Entwicklung der Mulita - La embriología de la Mulita (*Tatusia hybrida* Desm.). Revista del Museo de la Plata 21: 519.

Greenbaum E (2002) A standardized series of embryonic stages for the emydid turtle *Trachemys scripta*. Canadian Journal of Zoology 80: 1350-1370.

Greenbaum E, Carr JL (2002) Staging criteria for embryos of the spiny softshell turtle, *Apalone spinifera* (Testudines: Trionychidae). Journal of Morphology 254: 272-291.

Guyot G, Pieau C, Renous S (1994) Développement embryonnaire d'une tortue terrestre, la tortue d'Hermann, *Testudo hermanni* Gmelin, 1789. Annales des Sciences Naturelles Zoologie Paris 15: 115-137.

Hamburger V, Hamilton HL (1951) A series of normal stages in the development of the chick embryo. Journal of Morphology 88: 49-92.

Hubert J (1985) Embryology of the Squamata. In: Gans C, Billet F, Maderson PFA, editors. Biology of the Reptilia Volume 15 - Development B. New York: John Wiley & Sons. pp. 1-34.

Mahmoud IY, Hess GL, Klicka J (1973) Normal Embryonic Stages of the Western Painted Turtle, *Chrysemys picta bellii*. J Morph 141: 268-280.

McCrandy E, Jr. (1938) The embryology of the opossum. The American Anatomical Memoirs 16: 225.

Miller JD (1985) Embryology of marine turtles. In: Gans C, Billet F, Maderson PFA, editors. Biology of the Reptilia Volume 14 - Development A. New York: John Wiley & Sons. pp. 269-328.

Moffat LA (1985) Embryonic development and aspects of reproductive biology in the tuatara, *Sphenodon punctatus*.

Nye HLD, Cameron JA, Chernoff E-AG, Stocum L (2003) Extending the table of stages of normal development of Axolotl: Limb development. Developmental Dynamics 226: 555-560.

Parker WK (1880) Report on the development of the green turtle (*Chelone viridis*, Schneid.). Green: London Longmans. 1-57 p.

Renous S, Rimblot-Baly F, Fretey J, Pieau C (1989) Caractéristique du développement embryonnaire de la tortue luth, *Dermochelys coriacea* (Vandelli, 1761). Annales des Sciences Naturelles Zoologie Paris 10: 197-229.

Schoenwolf GC (2008) Atlas of descriptive embryology. San Francisco: Pearson Education. 125-195 p.

Semon R (1894a) Beobachtungen über die Lebensweise und Fortpflanzung der Monotremen nebst Notizen über ihre Körpertemperatur. Denkschriften der Medicinisch-Naturwissenschaftlichen Gesellschaft zu Jena 5: 3-15.

Semon R (1894b) Die Embryonalhüllen der Monotremen und Marsupialier. Denkschriften der Medicinisch-Naturwissenschaftlichen Gesellschaft zu Jena 5: 19-58.

Semon R (1894c) Zur Entwicklungsgeschichte der Monotremen. Denkschriften der Medicinisch-Naturwissenschaftlichen Gesellschaft zu Jena 5: 61-74.

Tokita M, Kuratani S (2001) Normal embryonic stages of the Chinese softshelled turtle *Pelodiscus sinensis* (Trionychidae). Zoological Science 18: 705-715.

Voeltzkow A (1899) Beiträge zur Entwicklungsgeschichte der Reptilien. I. Biologie und Entwicklung der äußeren Körperform von *Crocodylus madagascariensis*. Abhandlungen der Senckenbergischen Naturforschenden Gesellschaft 26: 1-150.

Yntema CL (1968) A series of stages in the embryonic development of *Chelydra serpentina*. Journal of Morphology 125: 219-251.
