# Supplementary material for: A Standard System to Study Vertebrate Embryos
Source: PLoS One. 2009 Jun 12;4(6):e5887. doi: 10.1371/journal.pone.0005887 (PMC2693928; doi:10.1371/journal.pone.0005887)
Supplement: Poster S1 — Template for printing the illustrated standard characters in a poster format. (20.49 MB PDF) [file pone.0005887.s004.pdf]

# Standard Event System (SES) for Vertebrate Embryology

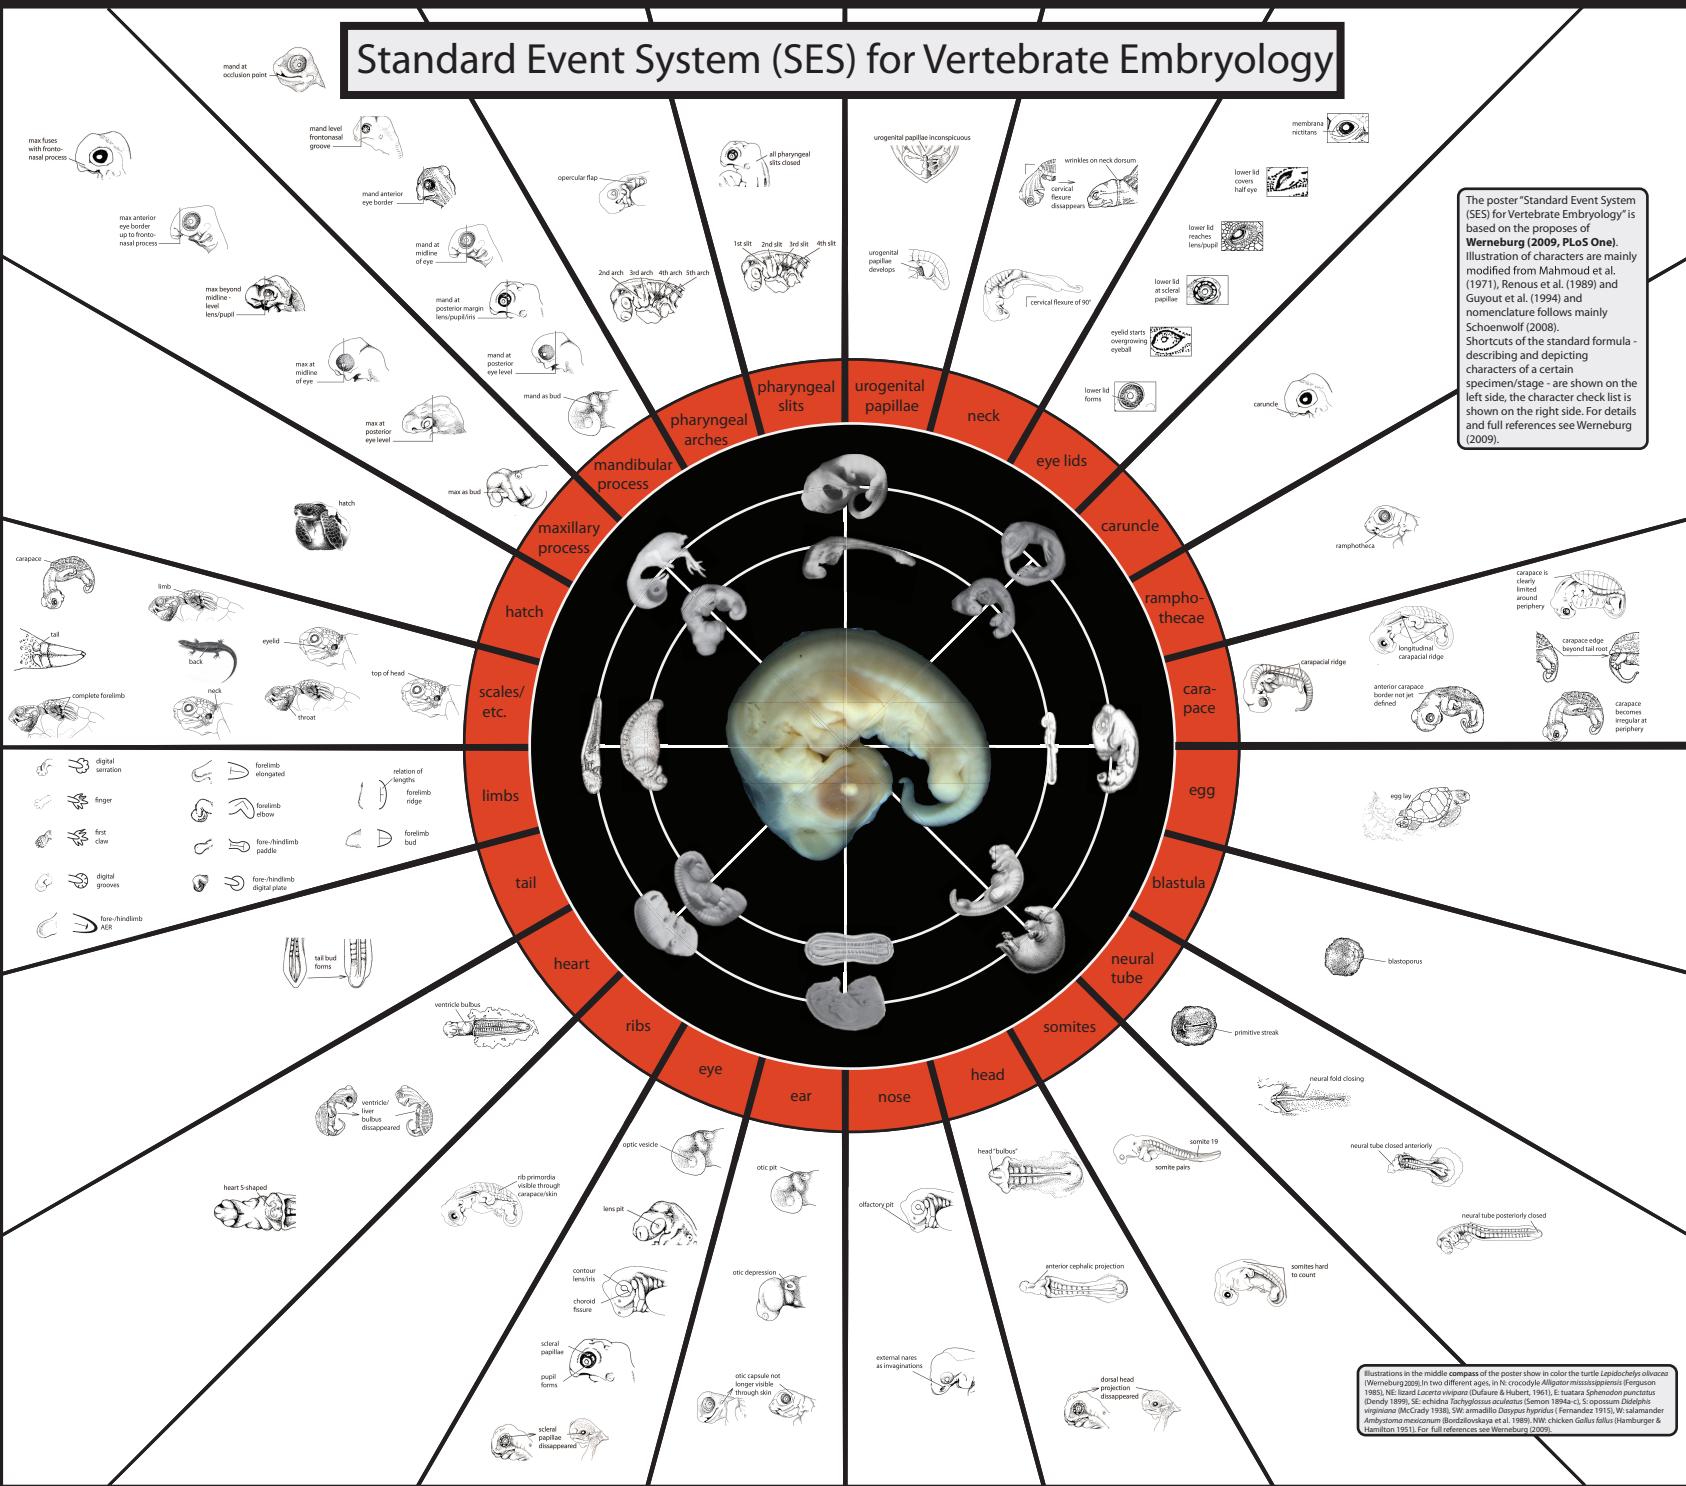

| CC                  | SEC  | SE                               |  |
|---------------------|------|----------------------------------|--|
| egg                 | V01a | egg lay                          |  |
| blastula            | V02a | blastopore                       |  |
|                     | V03a | ventral midline                  |  |
| neural tube         | V03b | neural folds closure             |  |
|                     | V03c | anterior neuropore closed        |  |
|                     | V03d | posterior neuropore closed       |  |
| somites             | V04a | somites hard count               |  |
|                     | V04b | 1-5 somite pairs                 |  |
|                     | V04c | 6-10 somite pairs                |  |
|                     | V04d | 11-15 somite pairs               |  |
|                     | V04e | 16-20 somite pairs               |  |
|                     | V04f | 21-25 somite pairs               |  |
|                     | V04g | 26-30 somite pairs               |  |
|                     | V04h | 31-35 somite pairs               |  |
|                     | V04i | 36-40 somite pairs               |  |
|                     | V04j | 41-45 somite pairs               |  |
|                     | V04k | 46-50 somite pairs               |  |
| head                | V05a | head bulbus                      |  |
|                     | V05b | anterior cephalic projection     |  |
|                     | V05c | head projection disappeared      |  |
| nose                | V06a | olfactory pit                    |  |
|                     | V06b | external nares                   |  |
| ear                 | V07a | otic pit                         |  |
|                     | V07b | otic vesicle                     |  |
|                     | V07c | otic capsule inconspicuous       |  |
|                     | V07d | otic vesicle                     |  |
|                     | V07e | lens pit / vesicle               |  |
| eye                 | V08a | optic fissure                    |  |
|                     | V08b | contour lens/iris                |  |
|                     | V08c | pupil forms                      |  |
|                     | V08d | scleral papillae                 |  |
|                     | V08e | scleral papillae inconspicuous   |  |
| rib                 | V09a | rib primordia                    |  |
| heart               | V10a | Ventricular bulbus               |  |
|                     | V10b | thoracic bulbus disappeared      |  |
| tail                | V11a | tail bud                         |  |
|                     | V11b | forelimb ridge                   |  |
|                     | V11c | forelimb bud                     |  |
|                     | V11d | forelimb elongated               |  |
|                     | V11e | forelimb AER                     |  |
|                     | V11f | hindlimb AER                     |  |
|                     | V11g | hindlimb elbow                   |  |
|                     | V11h | hindlimb paddle                  |  |
|                     | V11i | hindlimb paddle                  |  |
|                     | V11j | hindlimb digital plate           |  |
|                     | V11k | hindlimb digital groove          |  |
|                     | V11l | hindlimb digital serrat          |  |
|                     | V11m | finger                           |  |
|                     | V11n | first claw                       |  |
|                     | V11o | head scales                      |  |
|                     | V11p | throat scales                    |  |
|                     | V11q | eyelid scales                    |  |
|                     | V11r | neck scales                      |  |
|                     | V11s | limb scales                      |  |
|                     | V11t | whole forelimb scales            |  |
|                     | V11u | tail scales                      |  |
| scales/etc.         | V12a | carapace scales                  |  |
| hatch               | V13a | hatch                            |  |
|                     | V13b | max bud                          |  |
|                     | V13c | max posterior eye                |  |
|                     | V13d | max midline eye                  |  |
|                     | V13e | max anterior lens                |  |
|                     | V13f | max anterior eye                 |  |
|                     | V13g | max frontonasal fuse             |  |
|                     | V13h | mand arch bud                    |  |
|                     | V13i | mand posterior eye               |  |
|                     | V13j | mand posterior lens              |  |
|                     | V13k | mand midline eye                 |  |
|                     | V13l | mand anterior lens               |  |
|                     | V13m | mand anterior eye                |  |
|                     | V13n | mand level frontonasal           |  |
|                     | V13o | mand occlusion point             |  |
| pharyngeal arch     | V14a | 2nd arch                         |  |
|                     | V14b | 3rd arch                         |  |
|                     | V14c | 4th arch                         |  |
|                     | V14d | 5th arch                         |  |
|                     | V14e | hyoid flap                       |  |
| pharyngeal slit     | V15a | 1st slit                         |  |
|                     | V15b | 2nd slit                         |  |
|                     | V15c | 3rd slit                         |  |
|                     | V15d | 4th slit                         |  |
|                     | V15e | slits closed                     |  |
| urogenital papillae | V16a | urogenital papilla bud           |  |
|                     | V16b | urogenital papilla inconspicuous |  |
|                     | V16c | cervical flexure 90°             |  |
| neck                | V17a | cervical flexure disappeared     |  |
|                     | V17b | ventrals on neck                 |  |
| eye lids            | A01a | lower lid                        |  |
|                     | A01b | eyelid begun overgrow            |  |
|                     | A01c | eyelid at scleral papillae       |  |
|                     | A01d | eyelid ventral lens              |  |
|                     | A01e | eyelid half eye                  |  |
|                     | A01f | membrana nictitans               |  |
| caruncle            | A02a | caruncle                         |  |
| ramphothecae        | S01a | ramphothecae                     |  |
|                     | S02a | carapacial ridge                 |  |
|                     | S02b | longitudinal carapacial ridge    |  |
|                     | S02c | carapace not anterior            |  |
|                     | S02d | carapace clearly limited         |  |
|                     | S02e | carapace beyond tail             |  |
|                     | S02f | carapace irregular               |  |

| Standard Event System for Vertebrate Embryology | Character                        | Event | Code |
|-------------------------------------------------|----------------------------------|-------|------|
| egg                                             | egg lay                          | V01a  |      |
| blastula                                        | blastopore                       | V02a  |      |
| neural tube                                     | neural folds closure             | V03a  |      |
|                                                 | anterior neuropore closed        | V03b  |      |
|                                                 | posterior neuropore closed       | V03c  |      |
| somites                                         | somites hard count               | V04a  |      |
|                                                 | 1-5 somite pairs                 | V04b  |      |
|                                                 | 6-10 somite pairs                | V04c  |      |
|                                                 | 11-15 somite pairs               | V04d  |      |
|                                                 | 16-20 somite pairs               | V04e  |      |
|                                                 | 21-25 somite pairs               | V04f  |      |
|                                                 | 26-30 somite pairs               | V04g  |      |
|                                                 | 31-35 somite pairs               | V04h  |      |
|                                                 | 36-40 somite pairs               | V04i  |      |
|                                                 | 41-45 somite pairs               | V04j  |      |
|                                                 | 46-50 somite pairs               | V04k  |      |
| head                                            | head bulbus                      | V05a  |      |
|                                                 | anterior cephalic projection     | V05b  |      |
|                                                 | head projection disappeared      | V05c  |      |
| nose                                            | olfactory pit                    | V06a  |      |
|                                                 | external nares                   | V06b  |      |
| ear                                             | otic pit                         | V07a  |      |
|                                                 | otic vesicle                     | V07b  |      |
|                                                 | otic capsule inconspicuous       | V07c  |      |
|                                                 | otic vesicle                     | V07d  |      |
|                                                 | lens pit / vesicle               | V07e  |      |
| eye                                             | optic fissure                    | V08a  |      |
|                                                 | contour lens/iris                | V08b  |      |
|                                                 | pupil forms                      | V08c  |      |
|                                                 | scleral papillae                 | V08d  |      |
|                                                 | scleral papillae inconspicuous   | V08e  |      |
| rib                                             | rib primordia                    | V09a  |      |
| heart                                           | Ventricular bulbus               | V10a  |      |
|                                                 | thoracic bulbus disappeared      | V10b  |      |
| tail                                            | tail bud                         | V11a  |      |
|                                                 | forelimb ridge                   | V11b  |      |
|                                                 | forelimb bud                     | V11c  |      |
|                                                 | forelimb elongated               | V11d  |      |
|                                                 | forelimb AER                     | V11e  |      |
|                                                 | hindlimb AER                     | V11f  |      |
|                                                 | hindlimb elbow                   | V11g  |      |
|                                                 | hindlimb paddle                  | V11h  |      |
|                                                 | hindlimb paddle                  | V11i  |      |
|                                                 | hindlimb digital plate           | V11j  |      |
|                                                 | hindlimb digital groove          | V11k  |      |
|                                                 | hindlimb digital serrat          | V11l  |      |
|                                                 | finger                           | V11m  |      |
|                                                 | first claw                       | V11n  |      |
|                                                 | head scales                      | V11o  |      |
|                                                 | throat scales                    | V11p  |      |
|                                                 | eyelid scales                    | V11q  |      |
|                                                 | neck scales                      | V11r  |      |
|                                                 | limb scales                      | V11s  |      |
|                                                 | whole forelimb scales            | V11t  |      |
|                                                 | tail scales                      | V11u  |      |
| scales/etc.                                     | carapace scales                  | V12a  |      |
| hatch                                           | hatch                            | V13a  |      |
|                                                 | max bud                          | V13b  |      |
|                                                 | max posterior eye                | V13c  |      |
|                                                 | max midline eye                  | V13d  |      |
|                                                 | max anterior lens                | V13e  |      |
|                                                 | max anterior eye                 | V13f  |      |
|                                                 | max frontonasal fuse             | V13g  |      |
|                                                 | mand arch bud                    | V13h  |      |
|                                                 | mand posterior eye               | V13i  |      |
|                                                 | mand posterior lens              | V13j  |      |
|                                                 | mand midline eye                 | V13k  |      |
|                                                 | mand anterior lens               | V13l  |      |
|                                                 | mand anterior eye                | V13m  |      |
|                                                 | mand level frontonasal           | V13n  |      |
|                                                 | mand occlusion point             | V13o  |      |
| pharyngeal arch                                 | 2nd arch                         | V14a  |      |
|                                                 | 3rd arch                         | V14b  |      |
|                                                 | 4th arch                         | V14c  |      |
|                                                 | 5th arch                         | V14d  |      |
|                                                 | hyoid flap                       | V14e  |      |
| pharyngeal slit                                 | 1st slit                         | V15a  |      |
|                                                 | 2nd slit                         | V15b  |      |
|                                                 | 3rd slit                         | V15c  |      |
|                                                 | 4th slit                         | V15d  |      |
|                                                 | slits closed                     | V15e  |      |
| urogenital papillae                             | urogenital papilla bud           | V16a  |      |
|                                                 | urogenital papilla inconspicuous | V16b  |      |
|                                                 | cervical flexure 90°             | V16c  |      |
| neck                                            | cervical flexure disappeared     | V17a  |      |
|                                                 | ventrals on neck                 | V17b  |      |
| eye lids                                        | lower lid                        | A01a  |      |
|                                                 | eyelid begun overgrow            | A01b  |      |
|                                                 | eyelid at scleral papillae       | A01c  |      |
|                                                 | eyelid ventral lens              | A01d  |      |
|                                                 | eyelid half eye                  | A01e  |      |
|                                                 | membrana nictitans               | A01f  |      |
| caruncle                                        | caruncle                         | A02a  |      |
| ramphothecae                                    | ramphothecae                     | S01a  |      |
|                                                 | carapacial ridge                 | S02a  |      |
|                                                 | longitudinal carapacial ridge    | S02b  |      |
|                                                 | carapace not anterior            | S02c  |      |
|                                                 | carapace clearly limited         | S02d  |      |
|                                                 | carapace beyond tail             | S02e  |      |
|                                                 | carapace irregular               | S02f  |      |

| Standard Event System for Vertebrate Embryology | Character                        | Event | Code |
|-------------------------------------------------|----------------------------------|-------|------|
| egg                                             | egg lay                          | V01a  |      |
| blastula                                        | blastopore                       | V02a  |      |
| neural tube                                     | neural folds closure             | V03a  |      |
|                                                 | anterior neuropore closed        | V03b  |      |
|                                                 | posterior neuropore closed       | V03c  |      |
| somites                                         | somites hard count               | V04a  |      |
|                                                 | 1-5 somite pairs                 | V04b  |      |
|                                                 | 6-10 somite pairs                | V04c  |      |
|                                                 | 11-15 somite pairs               | V04d  |      |
|                                                 | 16-20 somite pairs               | V04e  |      |
|                                                 | 21-25 somite pairs               | V04f  |      |
|                                                 | 26-30 somite pairs               | V04g  |      |
|                                                 | 31-35 somite pairs               | V04h  |      |
|                                                 | 36-40 somite pairs               | V04i  |      |
|                                                 | 41-45 somite pairs               | V04j  |      |
|                                                 | 46-50 somite pairs               | V04k  |      |
| head                                            | head bulbus                      | V05a  |      |
|                                                 | anterior cephalic projection     | V05b  |      |
|                                                 | head projection disappeared      | V05c  |      |
| nose                                            | olfactory pit                    | V06a  |      |
|                                                 | external nares                   | V06b  |      |
| ear                                             | otic pit                         | V07a  |      |
|                                                 | otic vesicle                     | V07b  |      |
|                                                 | otic capsule inconspicuous       | V07c  |      |
|                                                 | otic vesicle                     | V07d  |      |
|                                                 | lens pit / vesicle               | V07e  |      |
| eye                                             | optic fissure                    | V08a  |      |
|                                                 | contour lens/iris                | V08b  |      |
|                                                 | pupil forms                      | V08c  |      |
|                                                 | scleral papillae                 | V08d  |      |
|                                                 | scleral papillae inconspicuous   | V08e  |      |
| rib                                             | rib primordia                    | V09a  |      |
| heart                                           | Ventricular bulbus               | V10a  |      |
|                                                 | thoracic bulbus disappeared      | V10b  |      |
| tail                                            | tail bud                         | V11a  |      |
|                                                 | forelimb ridge                   | V11b  |      |
|                                                 | forelimb bud                     | V11c  |      |
|                                                 | forelimb elongated               | V11d  |      |
|                                                 | forelimb AER                     | V11e  |      |
|                                                 | hindlimb AER                     | V11f  |      |
|                                                 | hindlimb elbow                   | V11g  |      |
|                                                 | hindlimb paddle                  | V11h  |      |
|                                                 | hindlimb paddle                  | V11i  |      |
|                                                 | hindlimb digital plate           | V11j  |      |
|                                                 | hindlimb digital groove          | V11k  |      |
|                                                 | hindlimb digital serrat          | V11l  |      |
|                                                 | finger                           | V11m  |      |
|                                                 | first claw                       | V11n  |      |
|                                                 | head scales                      | V11o  |      |
|                                                 | throat scales                    | V11p  |      |
|                                                 | eyelid scales                    | V11q  |      |
|                                                 | neck scales                      | V11r  |      |
|                                                 | limb scales                      | V11s  |      |
|                                                 | whole forelimb scales            | V11t  |      |
|                                                 | tail scales                      | V11u  |      |
| scales/etc.                                     | carapace scales                  | V12a  |      |
| hatch                                           | hatch                            | V13a  |      |
|                                                 | max bud                          | V13b  |      |
|                                                 | max posterior eye                | V13c  |      |
|                                                 | max midline eye                  | V13d  |      |
|                                                 | max anterior lens                | V13e  |      |
|                                                 | max anterior eye                 | V13f  |      |
|                                                 | max frontonasal fuse             | V13g  |      |
|                                                 | mand arch bud                    | V13h  |      |
|                                                 | mand posterior eye               | V13i  |      |
|                                                 | mand posterior lens              | V13j  |      |
|                                                 | mand midline eye                 | V13k  |      |
|                                                 | mand anterior lens               | V13l  |      |
|                                                 | mand anterior eye                | V13m  |      |
|                                                 | mand level frontonasal           | V13n  |      |
|                                                 | mand occlusion point             | V13o  |      |
| pharyngeal arch                                 | 2nd arch                         | V14a  |      |
|                                                 | 3rd arch                         | V14b  |      |
|                                                 | 4th arch                         | V14c  |      |
|                                                 | 5th arch                         | V14d  |      |
|                                                 | hyoid flap                       | V14e  |      |
| pharyngeal slit                                 | 1st slit                         | V15a  |      |
|                                                 | 2nd slit                         | V15b  |      |
|                                                 | 3rd slit                         | V15c  |      |
|                                                 | 4th slit                         | V15d  |      |
|                                                 | slits closed                     | V15e  |      |
| urogenital papillae                             | urogenital papilla bud           | V16a  |      |
|                                                 | urogenital papilla inconspicuous | V16b  |      |
|                                                 | cervical flexure 90°             | V16c  |      |
| neck                                            | cervical flexure disappeared     | V17a  |      |
|                                                 | ventrals on neck                 | V17b  |      |
| eye lids                                        | lower lid                        | A01a  |      |
|                                                 | eyelid begun overgrow            | A01b  |      |
|                                                 | eyelid at scleral papillae       | A01c  |      |
|                                                 | eyelid ventral lens              | A01d  |      |
|                                                 | eyelid half eye                  | A01e  |      |
|                                                 | membrana nictitans               | A01f  |      |
| caruncle                                        | caruncle                         | A02a  |      |
| ramphothecae                                    | ramphothecae                     | S01a  |      |
|                                                 | carapacial ridge                 | S02a  |      |
|                                                 | longitudinal carapacial ridge    | S02b  |      |
|                                                 | carapace not anterior            | S02c  |      |
|                                                 | carapace clearly limited         | S02d  |      |
|                                                 | carapace beyond tail             | S02e  |      |
|                                                 | carapace irregular               | S02f  |      |

## Standard Event System for Vertebrate Embryology

| Character   | Event                          | Code |
|-------------|--------------------------------|------|
| egg         | egg lay                        | V01a |
| blastula    | blastopore                     | V02a |
| neural tube | neural folds closure           | V03a |
|             | anterior neuropore closed      | V03b |
|             | posterior neuropore closed     | V03c |
| somites     | somites hard count             | V04a |
|             | 1-5 somite pairs               | V04b |
|             | 6-10 somite pairs              | V04c |
|             | 11-15 somite pairs             | V04d |
|             | 16-20 somite pairs             | V04e |
|             | 21-25 somite pairs             | V04f |
|             | 26-30 somite pairs             | V04g |
|             | 31-35 somite pairs             | V04h |
|             | 36-40 somite pairs             | V04i |
|             | 41-45 somite pairs             | V04j |
|             | 46-50 somite pairs             | V04k |
| head        | head bulbus                    | V05a |
|             | anterior cephalic projection   | V05b |
|             | head projection disappeared    | V05c |
| nose        | olfactory pit                  | V06a |
|             | external nares                 | V06b |
| ear         | otic pit                       | V07a |
|             | otic vesicle                   | V07b |
|             | otic capsule inconspicuous     | V07c |
|             | otic vesicle                   | V07d |
|             | lens pit / vesicle             | V07e |
| eye         | optic fissure                  | V08a |
|             | contour lens/iris              | V08b |
|             | pupil forms                    | V08c |
|             | scleral papillae               | V08d |
|             | scleral papillae inconspicuous | V08e |
| rib         | rib primordia                  | V09a |
| heart       | Ventricular bulbus             | V10a |
|             | thoracic bulbus disappeared    | V10b |
| tail        | tail bud                       | V11a |
|             | forelimb ridge                 | V11b |
|             | forelimb bud                   | V11c |
|             | forelimb elongated             | V11d |
|             | forelimb AER                   | V11e |
|             | hindlimb AER                   | V11f |
|             | hindlimb elbow                 | V11g |
|             | hindlimb paddle                | V11h |
|             | hindlimb paddle                | V11i |
|             | hindlimb digital plate         | V11j |
|             | hindlimb digital groove        | V11k |
|             | hindlimb digital serrat        | V11l |
|             | finger                         | V11m |
|             | first claw                     | V11n |
|             | head scales                    | V11o |
|             | throat scales                  | V11p |
|             | eyelid scales                  | V11q |
|             | neck scales                    | V11r |
|             | limb scales                    | V11s |
|             | whole forelimb scales          | V11t |
|             | tail scales                    | V11u |
| scales/etc. | carapace scales                | V12a |
| hatch       | hatch                          | V13a |
|             | max bud                        | V13b |
|             | max posterior eye              | V13c |
|             | max midline eye                | V13d |
|             | max anterior lens              | V13e |
|             | max anterior eye               | V13f |

Fig. 135. B39 (photograph of) Nototheniidae

Fig. 136. B39 (photograph of) Nototheniidae
